# Supplementary material
Source: PubMed Central journal article supplement (PMC7467671)
Supplement: ic9b03737_si_001.pdf [file ic9b03737_si_001.pdf]

## Supporting Information for

# Exploring the Specificity of Rationally Designed Peptides Reconstituted from the Cell-Free Extract of *Deinococcus radiodurans* toward Mn(II) and Cu(II)

Peana Massimiliano,<sup>\*,†</sup> Elzbieta Gumienna-Kontecka,<sup>\*,‡</sup> Francesca Piras,<sup>†</sup> Malgorzata Ostrowska,<sup>‡</sup> Karolina Piasta,<sup>‡</sup> Karolina Krzywoszynska,<sup>§</sup> Serenella Medici,<sup>†</sup> and Maria Antonietta Zoroddu<sup>†</sup>

<sup>†</sup>Department of Chemistry and Pharmacy, University of Sassari, Via Vienna 2, 07100 Sassari, Italy.

<sup>‡</sup>Faculty of Chemistry, University of Wrocław, 14 F. Joliot-Curie St. 50-383 Wrocław, Poland.

<sup>§</sup>Public Higher Medical Professional School in Opole, Katowicka 68, 45-060 Opole, Poland.

### \* Corresponding Authors

**Massimiliano Peana** – Department of Chemistry and Pharmacy, University of Sassari, 07100 Sassari, Italy;

 [orcid.org/0000-0002-3306-0419](https://orcid.org/0000-0002-3306-0419); Email: [peana@uniss.it](mailto:peana@uniss.it)

**Elzbieta Gumienna-Kontecka** – Faculty of Chemistry, University of Wrocław, 50-383 Wrocław, Poland;

 [orcid.org/0000-0002-9556-6378](https://orcid.org/0000-0002-9556-6378); Email: [elzbieta.gumienna-kontecka@chem.uni.wroc.pl](mailto:elzbieta.gumienna-kontecka@chem.uni.wroc.pl)

## Figures and Tables

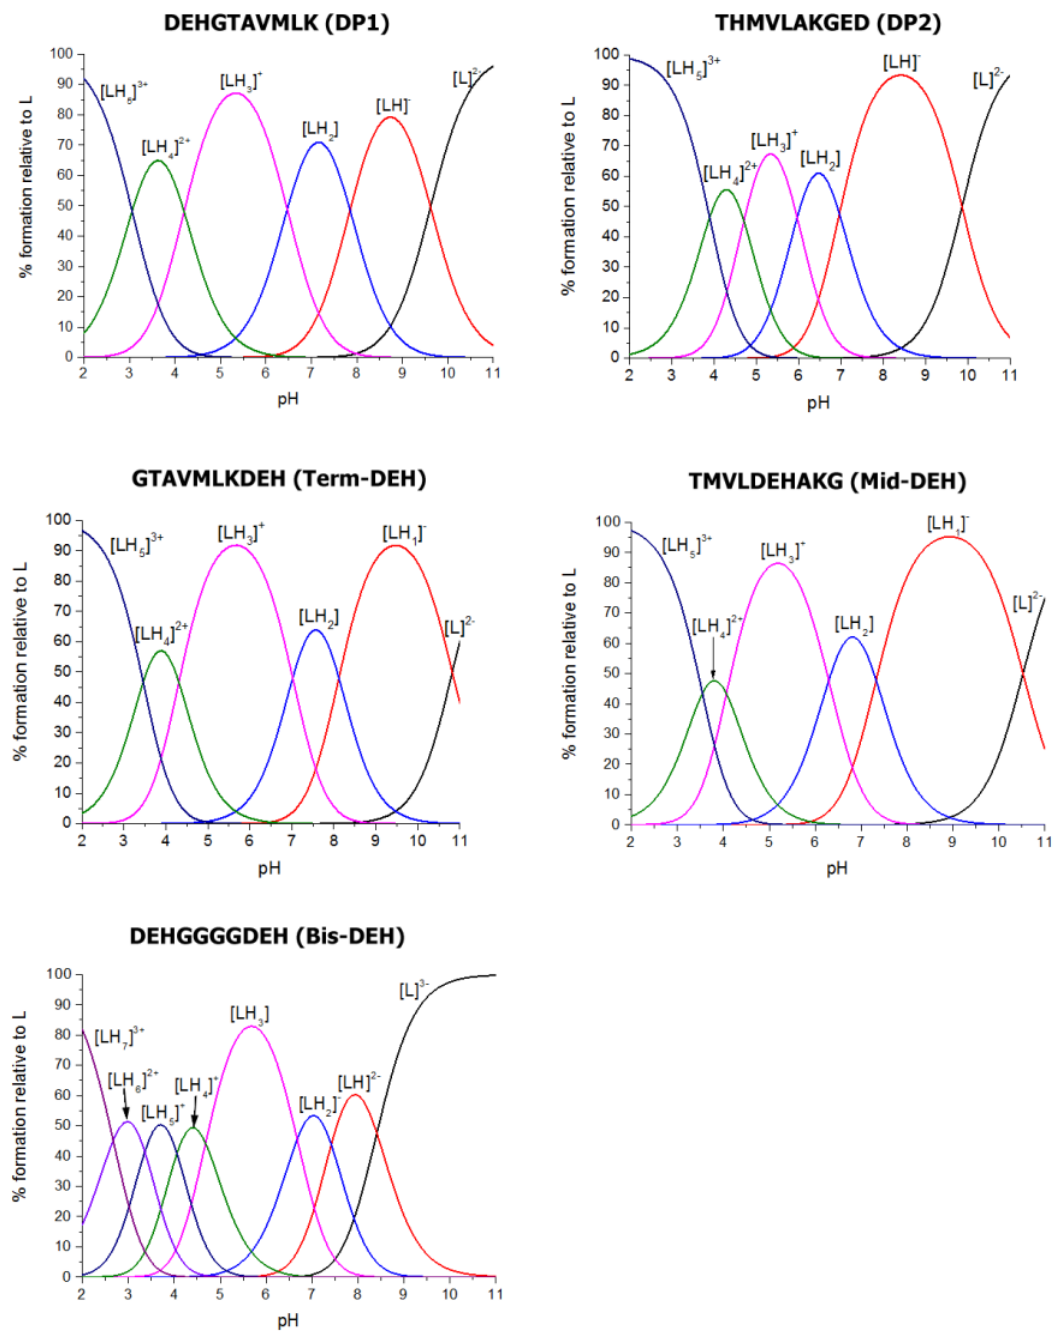

**Figure S1.** Representative distribution diagram for the protonation equilibria of DEHGTAVMLK (DP1), THMVLAKGED (DP2), GTAVMLKDEH (Term-DEH), TMVLDEHAKG (Mid-DEH) and DEHGGGGDEH (Bis-DEH), at  $T = 298\text{ K}$  and  $I = 0.1\text{ M NaClO}_4$ .

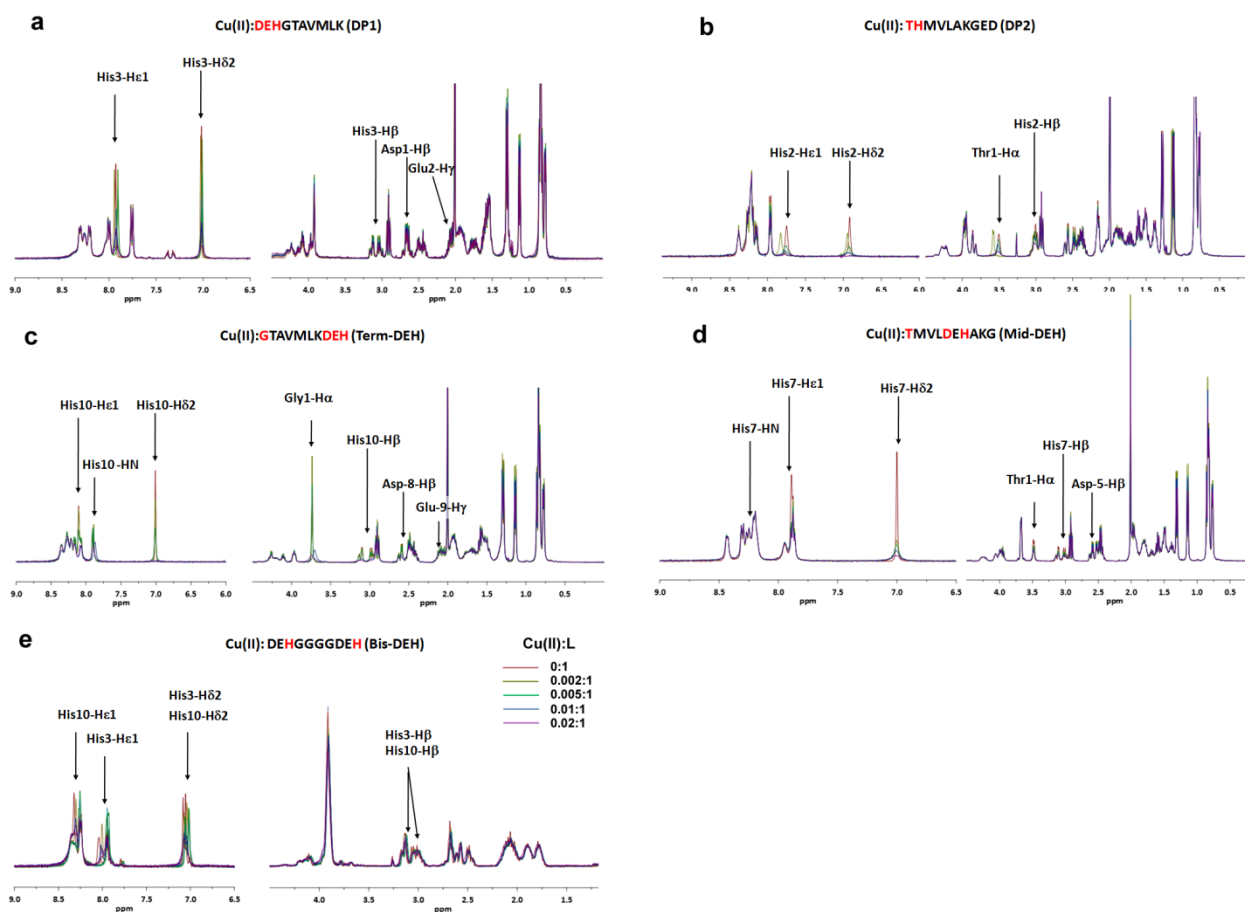

**Figure S2.** Superposition of 1D  $^1\text{H}$  NMR spectra for a) DEHGTAVMLK (DP1), b) THMVLAKGED (DP2), c) GTAVMLKDEH (Term-DEH), d) TMVLDEHAKG (Mid-DEH) and e) DEHGGGGDEH (Bis-DEH) peptides by increasing amounts of Cu(II) from 0:1 to 0.02:1 metal to ligand molar ratio, at pH  $\sim$ 7. The residues experiencing the largest relaxation effects are labeled in the spectra and highlighted along the sequence in red color.

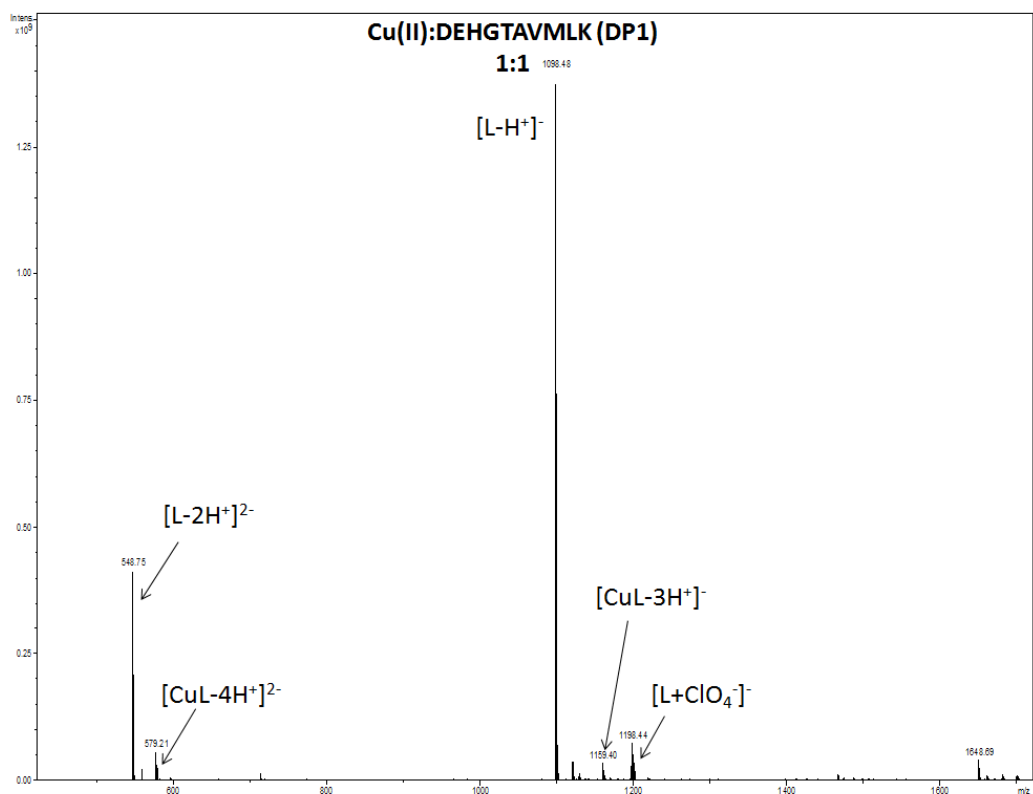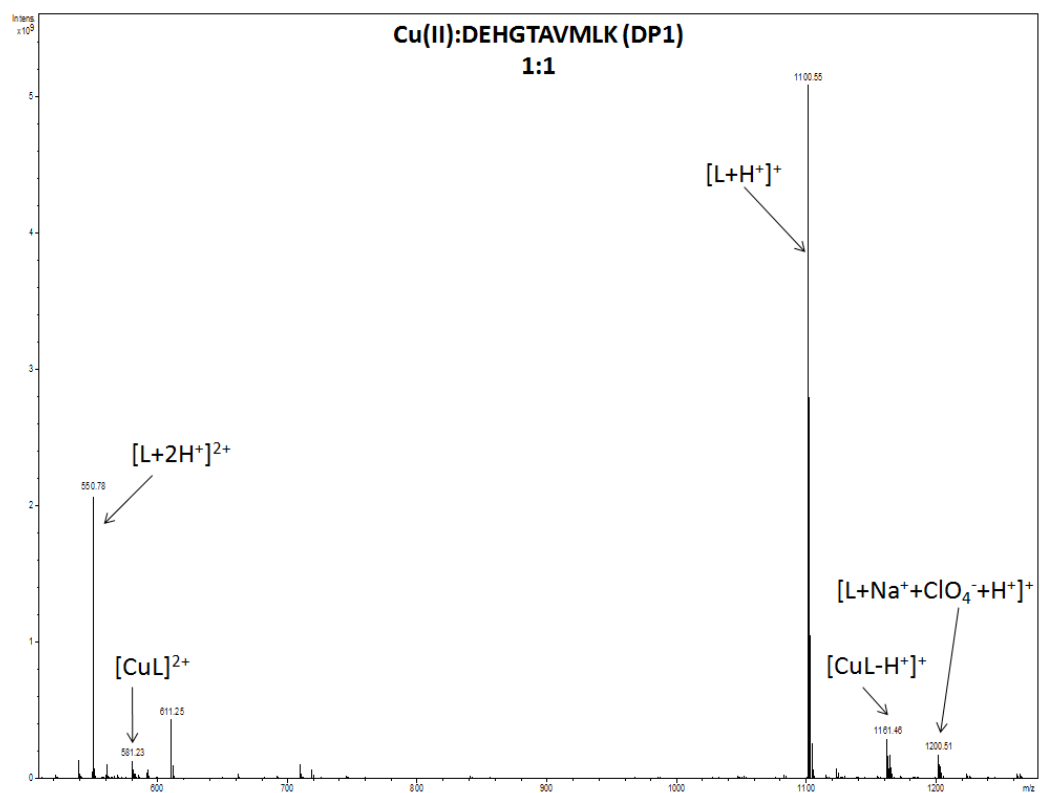

**Figure S3.** ESI-MS of Cu(II):DEHGTAVMLK (DP1), at 1:1 molar ratio and pH 7.

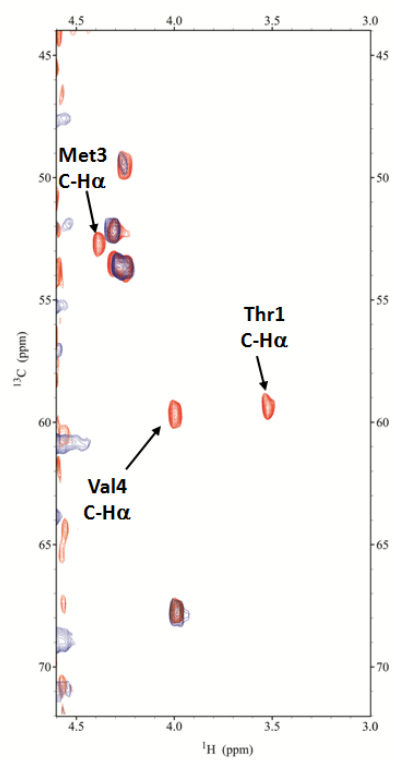

**Figure S4.** Aliphatic region of  $^1\text{H}$ - $^{13}\text{C}$  HSQC spectrum of DP2 free (red) and Cu(II):DP2 system at 0.02:1 molar ratio (blue), and pH 10. Disappearing peaks are labeled.

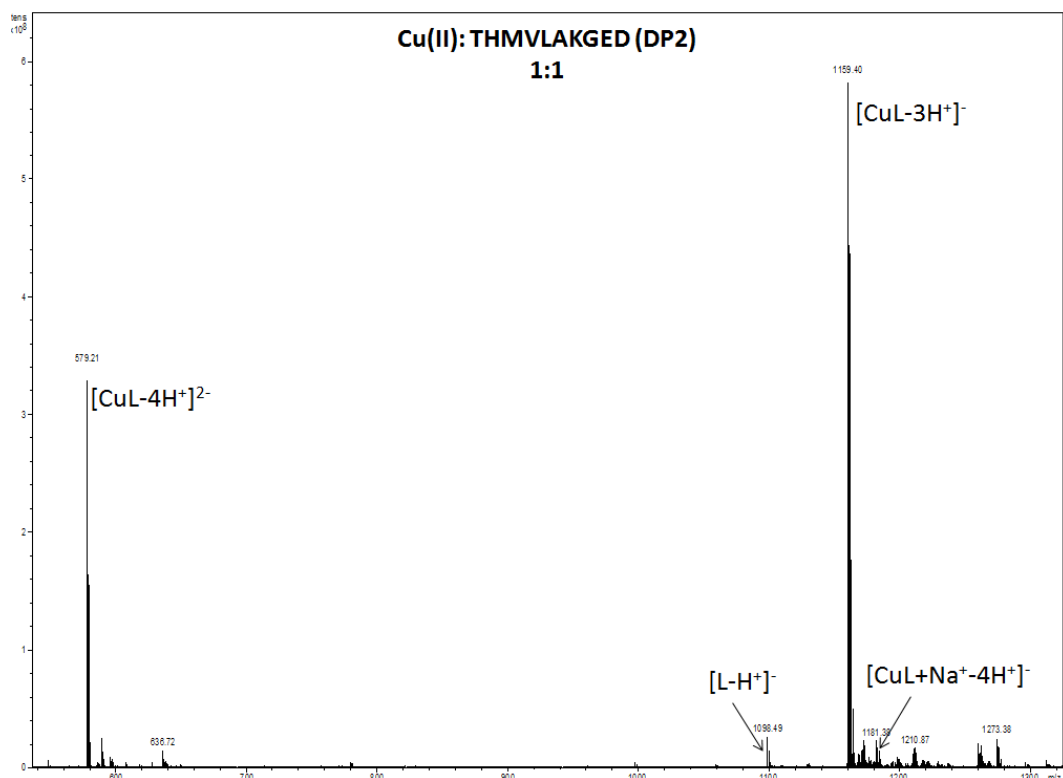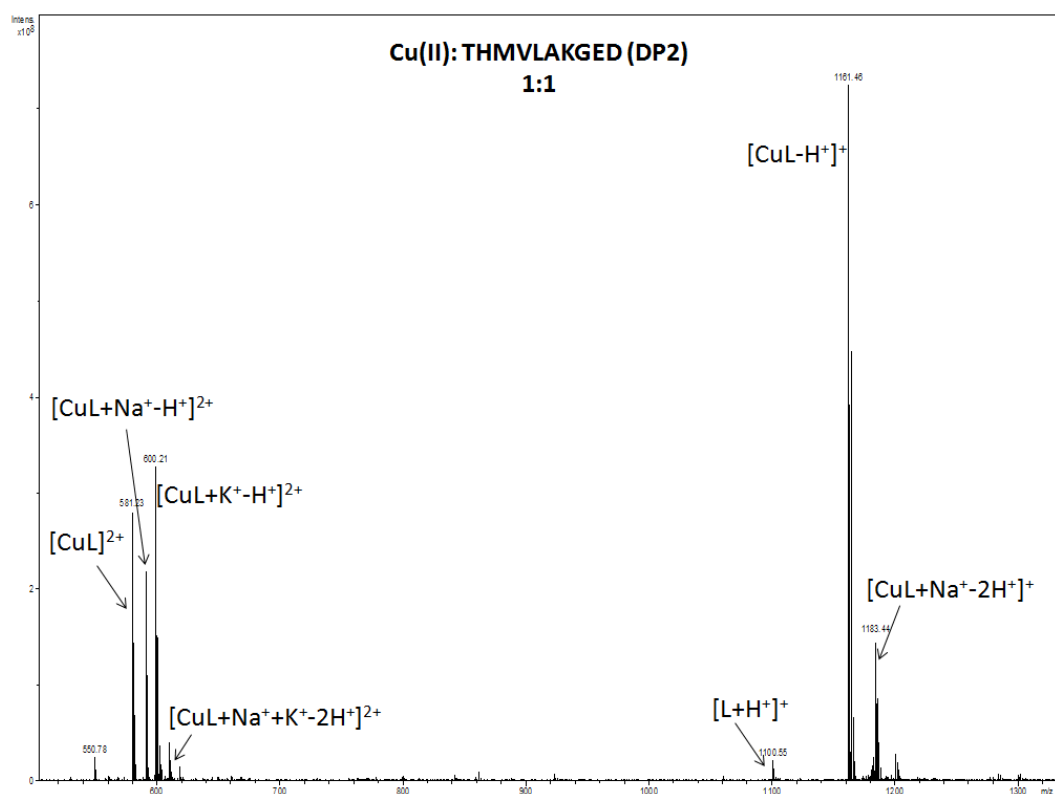

**Figure S5.** ESI-MS of Cu(II):THMVLAKEGED (DP2), at 1:1 molar ratio, and pH 7.

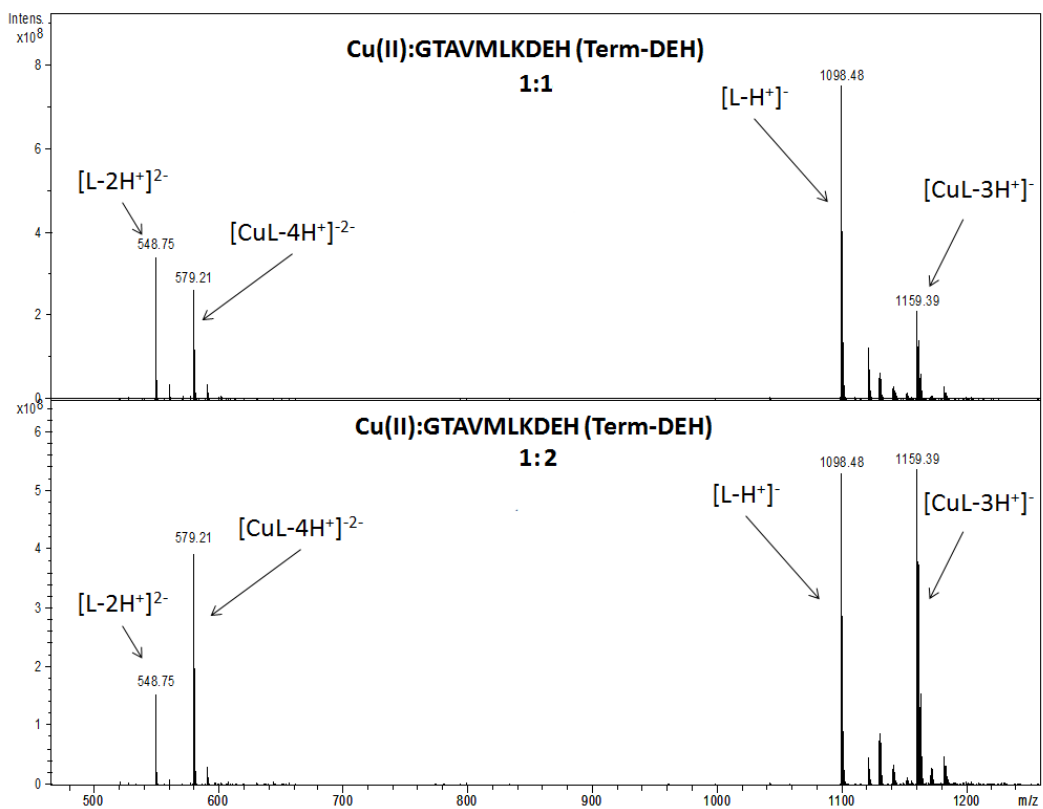

**Figure S6.** ESI-MS of Cu(II):GTAVMLKDEH (Term-DEH), at 1:1 and 1:2 molar ratio, and pH 7.

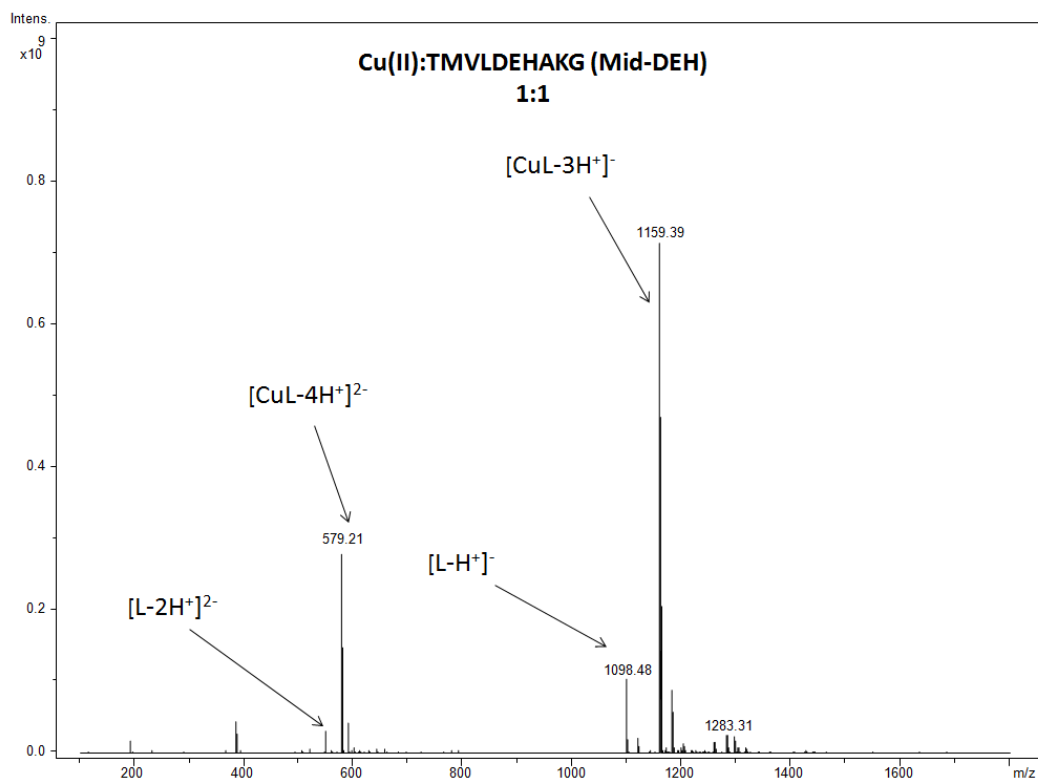

**Figure S7.** ESI-MS of Cu(II):TMVLDEHAKG (Mid-DEH), at 1:1 molar ratio, and pH 7.



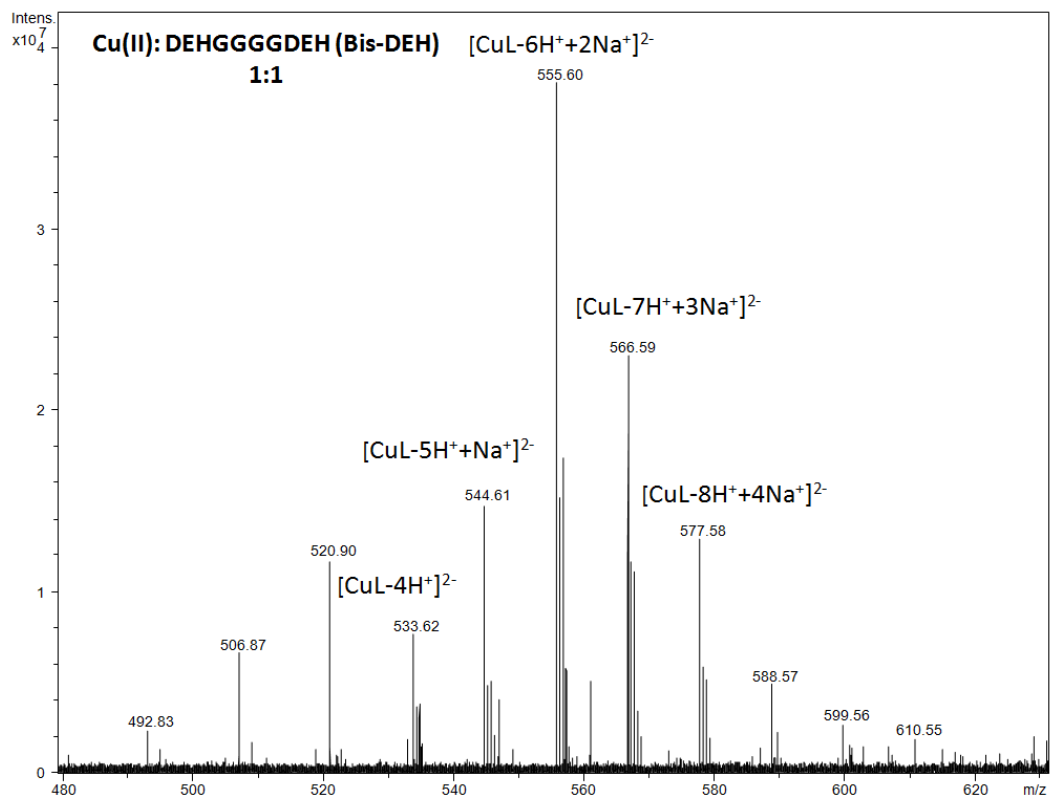

**Figure S8.** ESI-MS of Cu(II):DEHGGGGDEH (Bis-DEH), at 1:1 molar ratio, and pH 7.

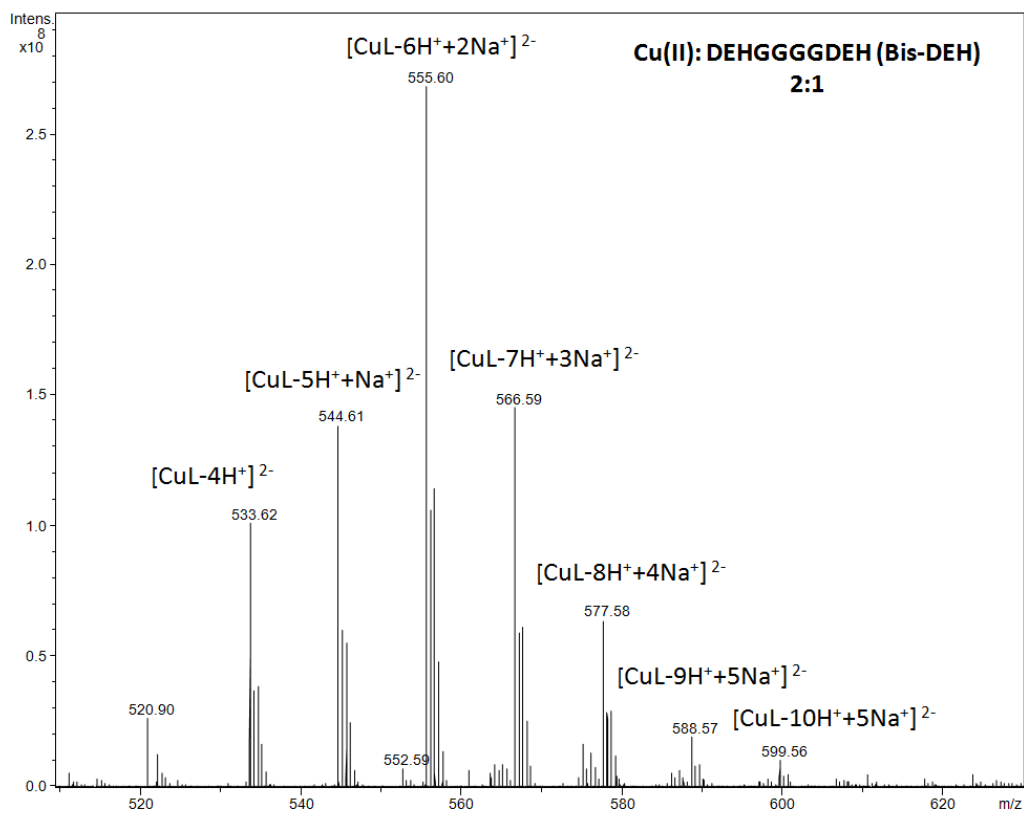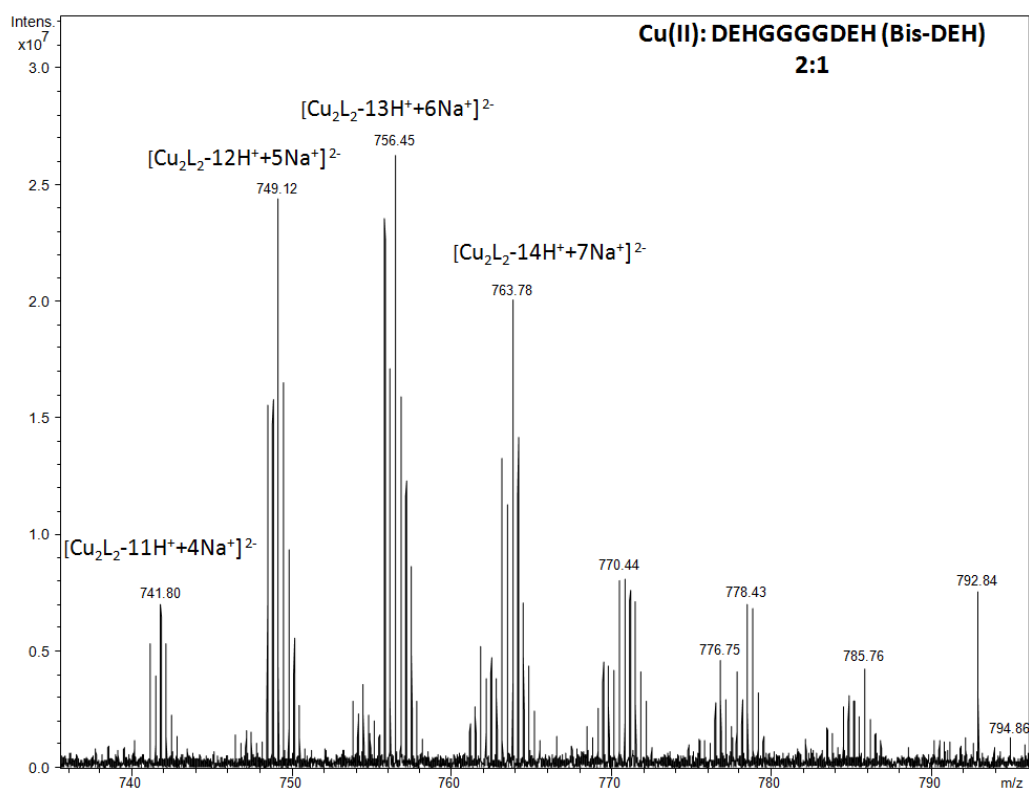

**Figure S9.** ESI-MS of Cu(II):DEHGGGGDEH (Bis-DEH) at 2:1 molar ratio, and pH 7.

**Mn(II):GTAVMLKDEH (Term-DEH)  
1.1:1**

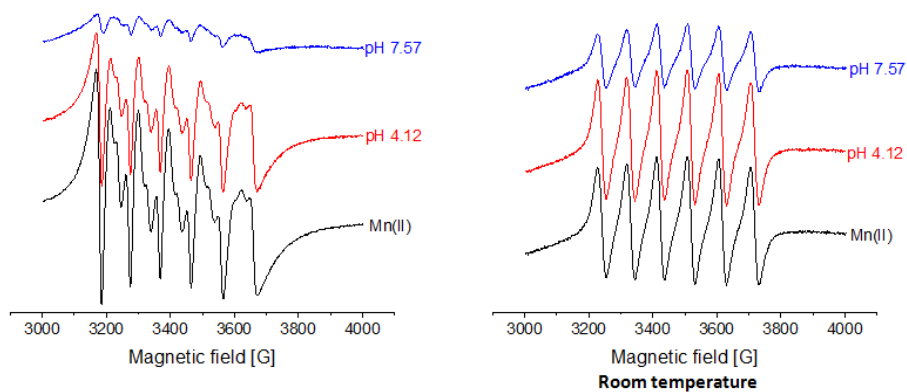

**Mn(II):TMVLDEHAKG (Mid-DEH)  
1.1:1**

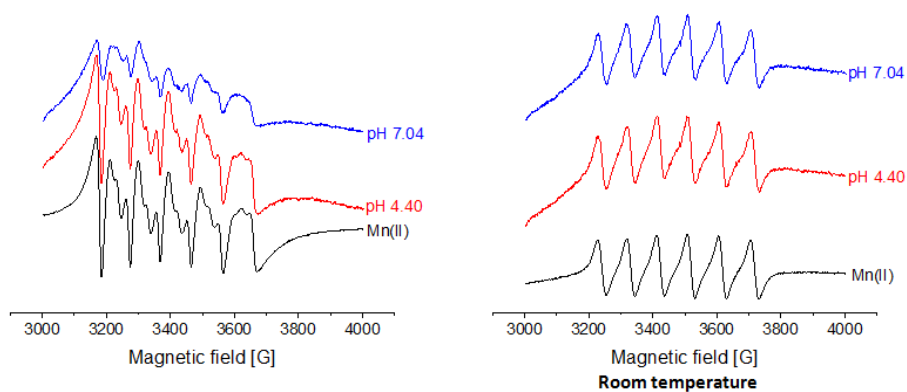

**Mn(II):DEHGGGDEH (Bis-DEH)  
1:1.1**

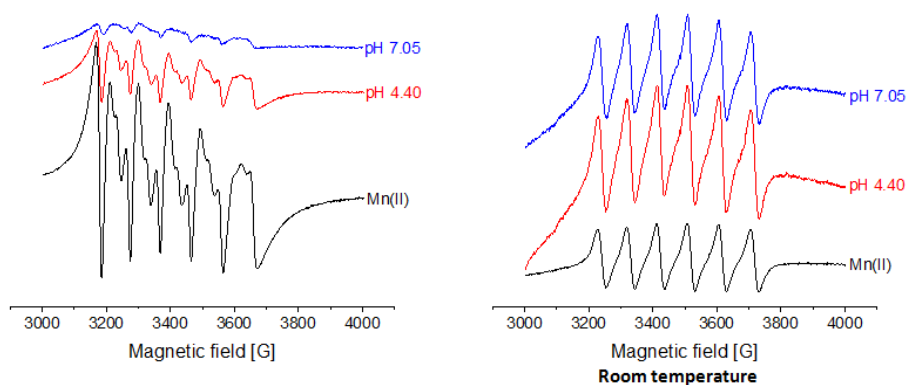

**Figure S10.** EPR spectra of the Mn(II)-peptides system as a function of pH.

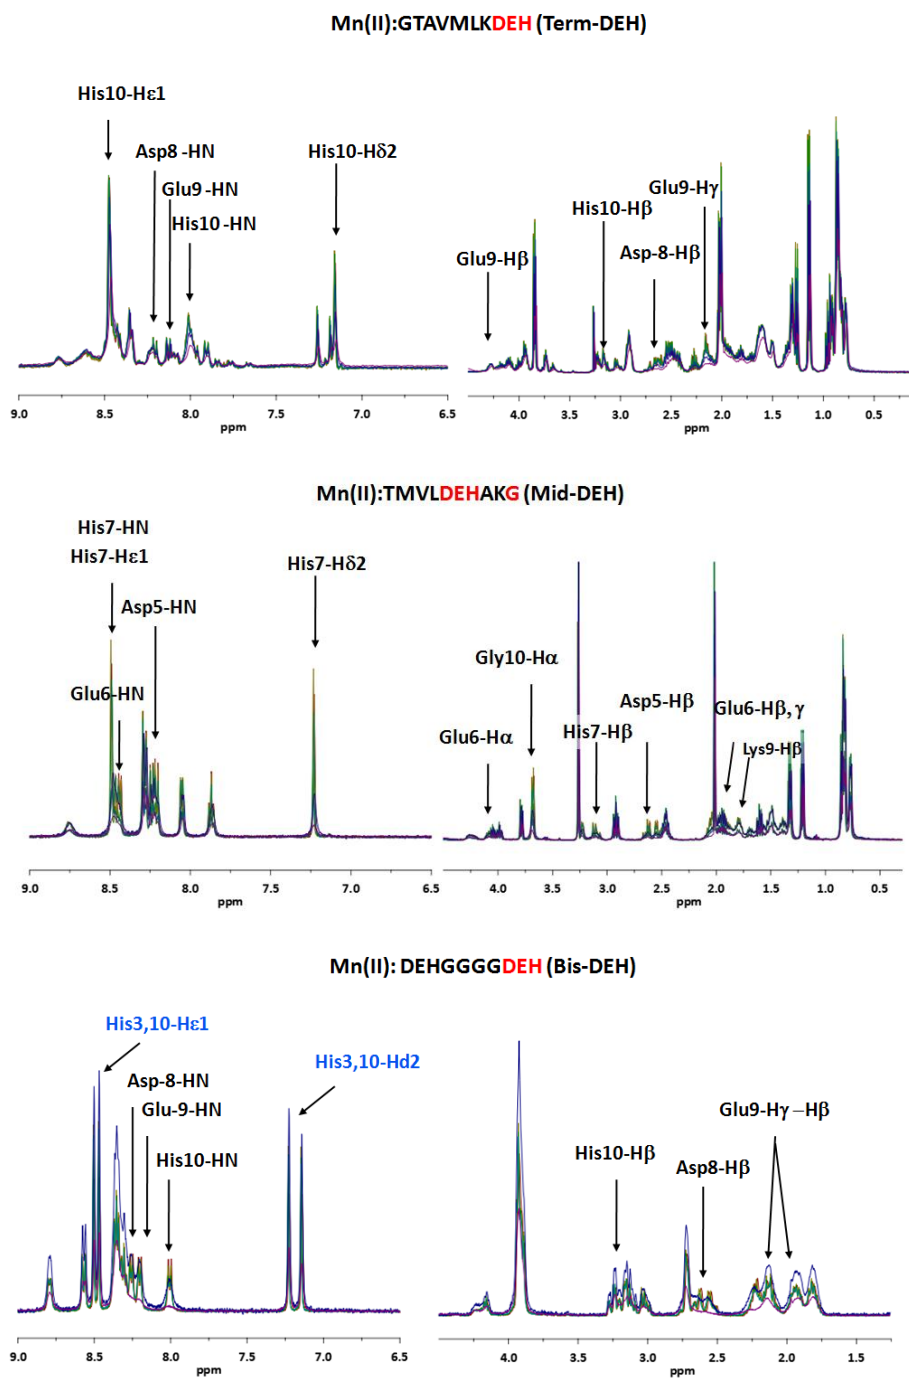

**Figure S11.** Superposition of 1D  $^1\text{H}$  NMR spectra for GTAVMLKDEH (Term-DEH), TMVLDEHAKG (Mid-DEH) and DEHGGGDEH (Bis-DEH) peptides by increasing substochiometric Mn(II) to ligand molar ratio, at pH 5.

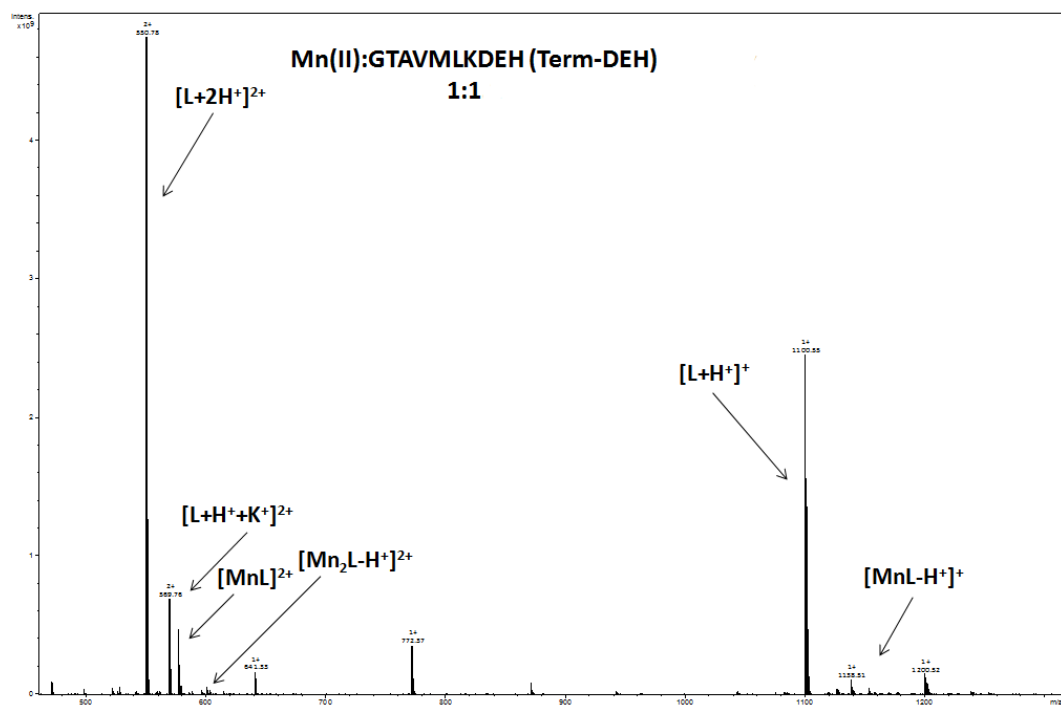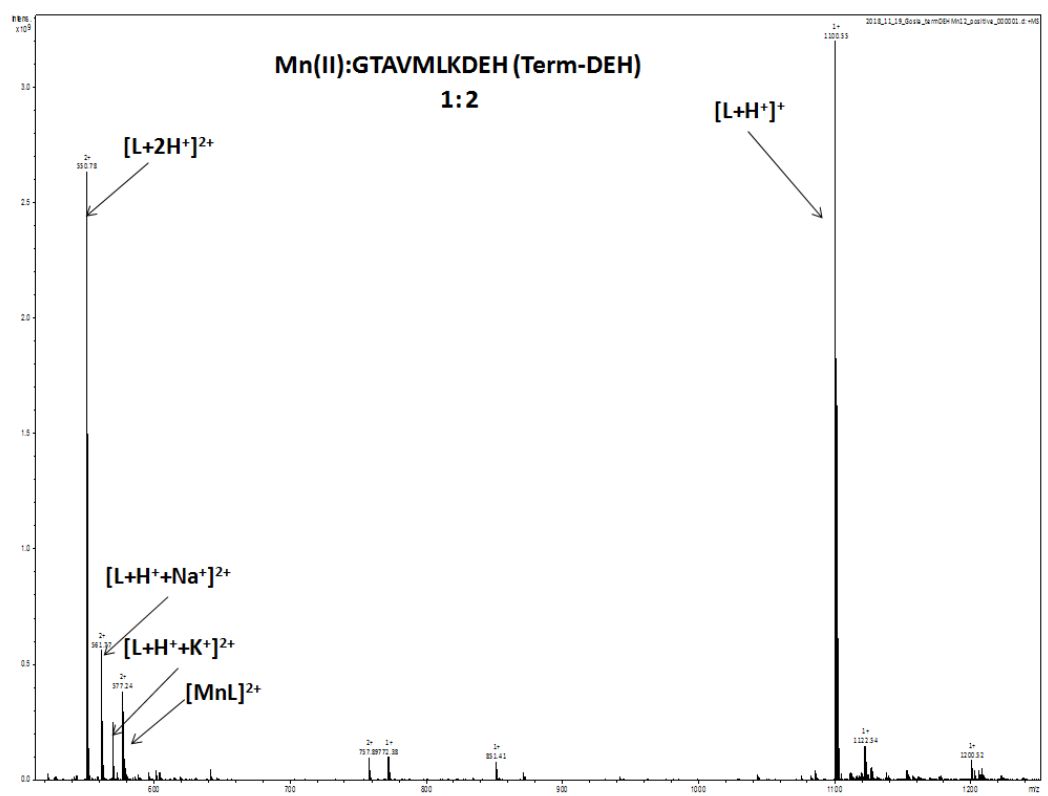

**Figure S12.** ESI-MS of Mn(II):GTAVMLKDEH (Term-DEH), at 1:1 and 1:2 molar ratio, and pH 7.5.

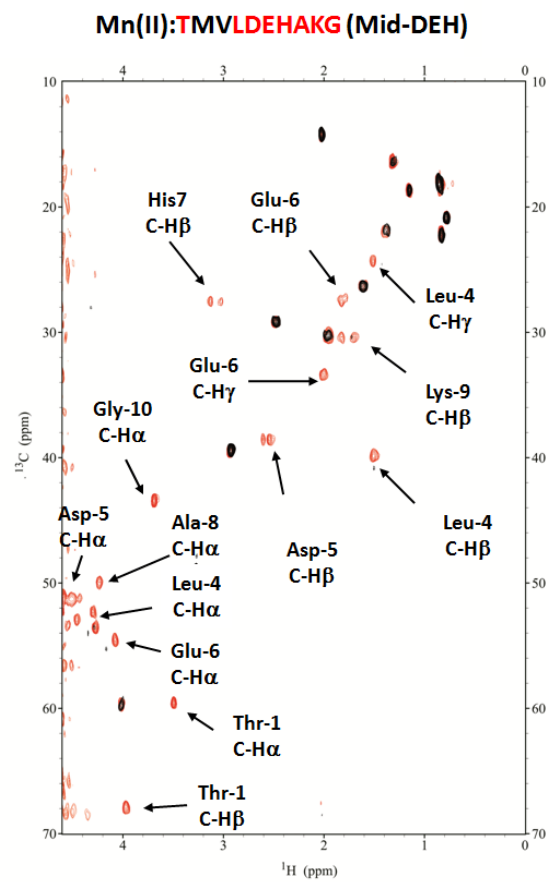

**Figure S13.** Aromatic and aliphatic region of  $^1\text{H}$ - $^{13}\text{C}$  HSQC spectrum of free Mid-DEH (red) and Mn(II): Mid-DEH at 0.1:1 molar ratio (blue) and pH 7.2. Disappearing peaks are labeled.

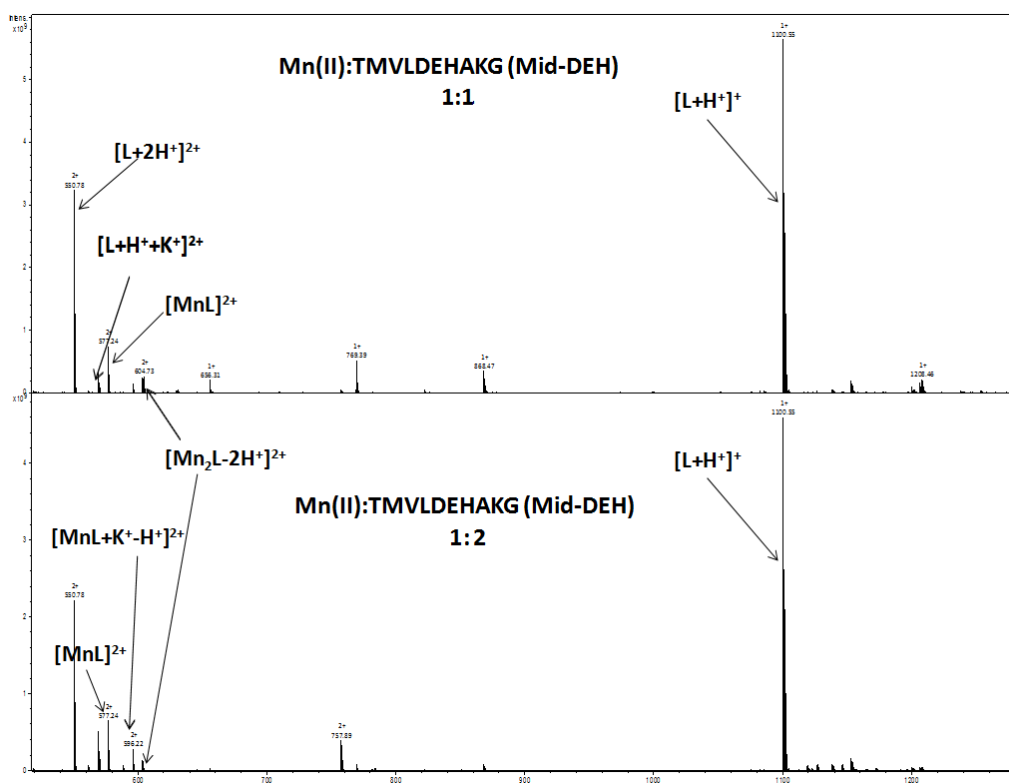

**Figure S14.** ESI-MS of Mn(II):TMVLDEHAKG (Mid-DEH), at 1:1 and 1:2 molar ratio, and pH 7.5.

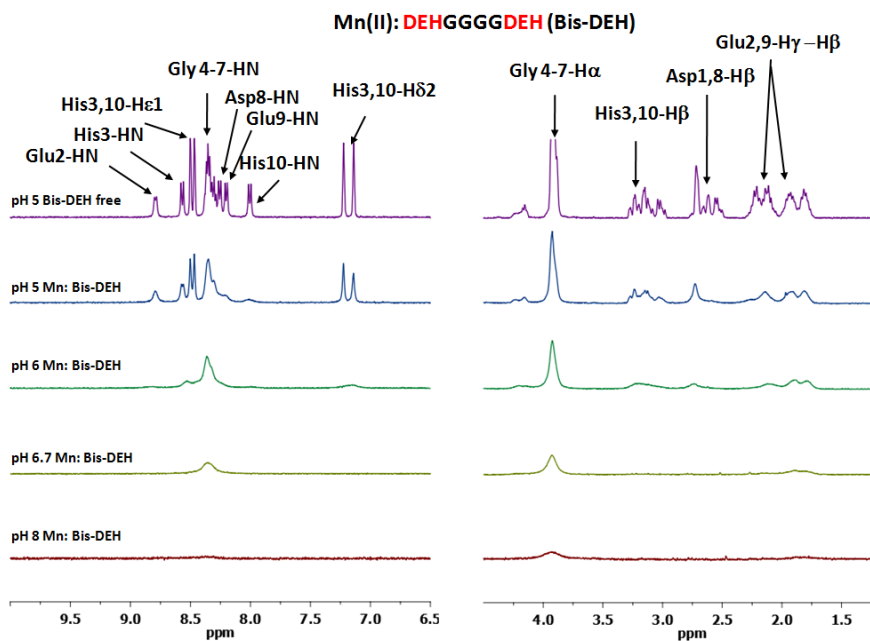

**Figure S15.** Comparison of 1D  $^1\text{H}$  NMR spectra for free DEHGGGGDEH (Bis-DEH) at pH 5, and Mn(II):Bis-DEH system (0.05:1 molar ratio) at pH 5, 6, 6.7 and 8, respectively.

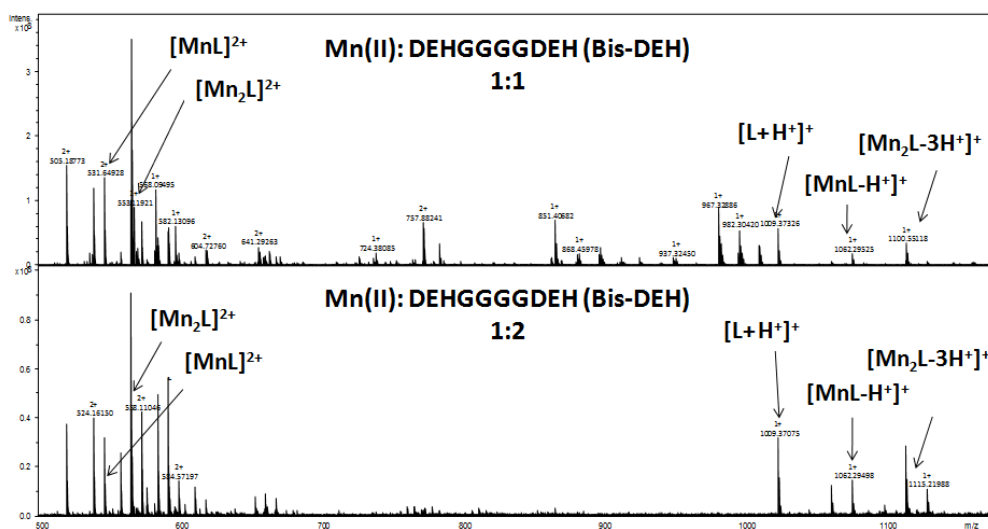

**Figure S16.** ESI-MS of Mn(II):DEHGGGGDEH (Bis-DEH), at 1:1 and 1:2 molar ratio, and pH 7.5.



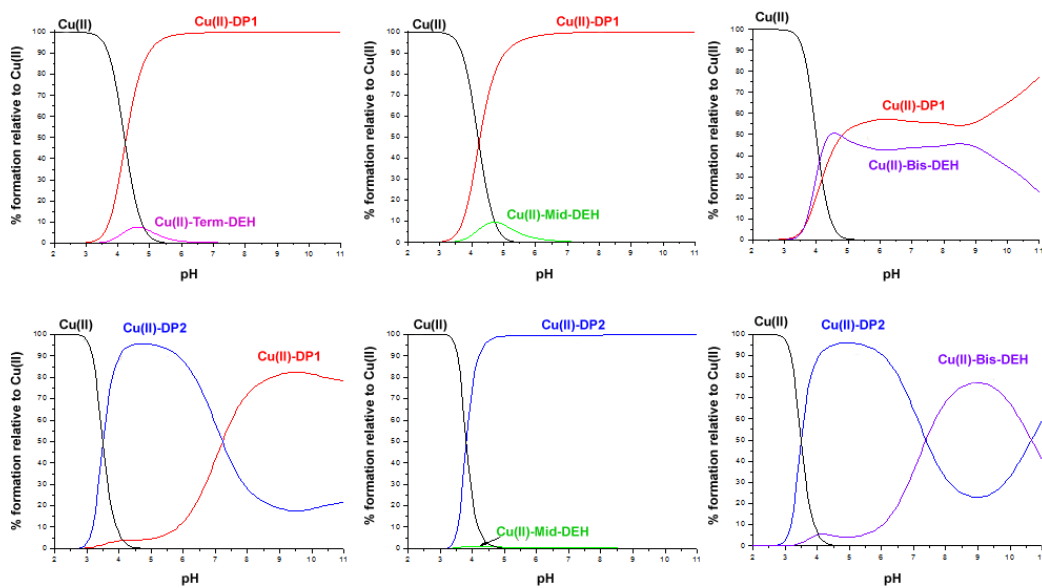

**Figure S17.** Competition plots for a pair of peptides between DEHGTAVMLK (DP1), THMVLAKGED (DP2), GTAVMLKDEH (Term-DEH); TMVLDEHAKG (Mid-DEH) and DEHGGGGDEH (Bis-DEH).

The calculated stability constants are applied to a theoretical situation, in which equimolar amounts of pair of peptides are competing for the binding with Cu(II) ion in 1:1:1 metal-to-ligand molar ratio.

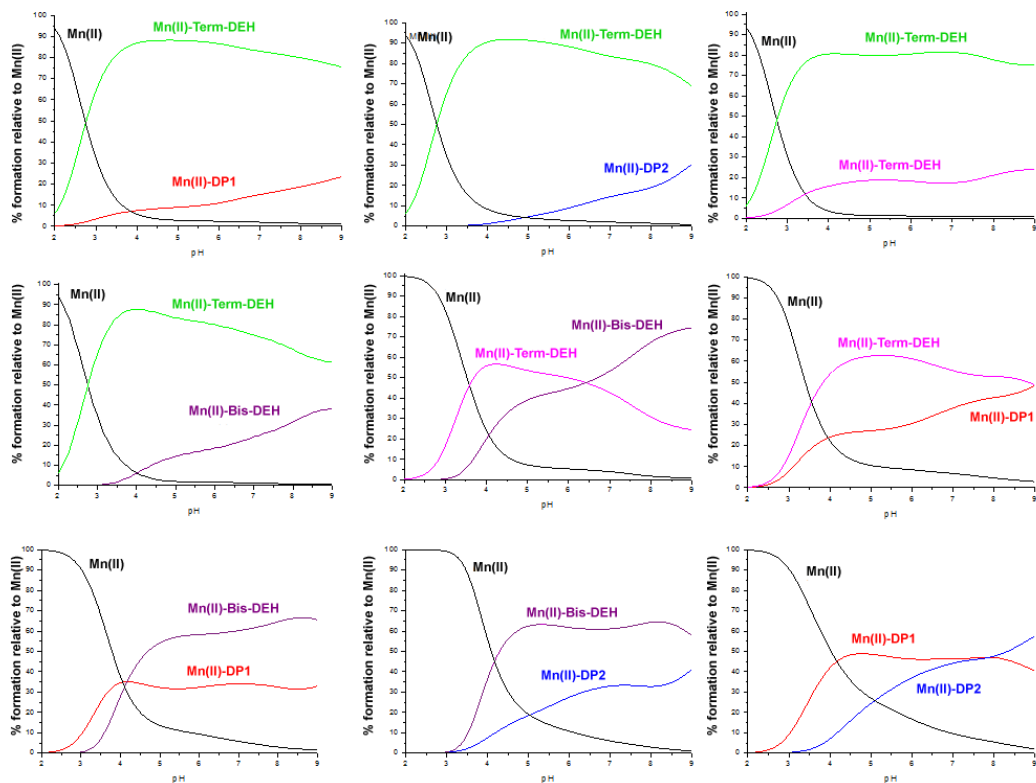

**Figure S18.** Competition plots for a pair of peptides between DEHGTVMLK (DP1), THMVLAKGED (DP2), GTAVMLKDEH (Term-DEH); TMVLDEHAKG (Mid-DEH) and DEHGGGDEH (Bis-DEH). The calculated stability constants are applied to a theoretical situation, in which equimolar amounts of pair of peptides are competing for the binding with Mn(II) ion in 1:1:1 metal-to-ligand molar ratio.

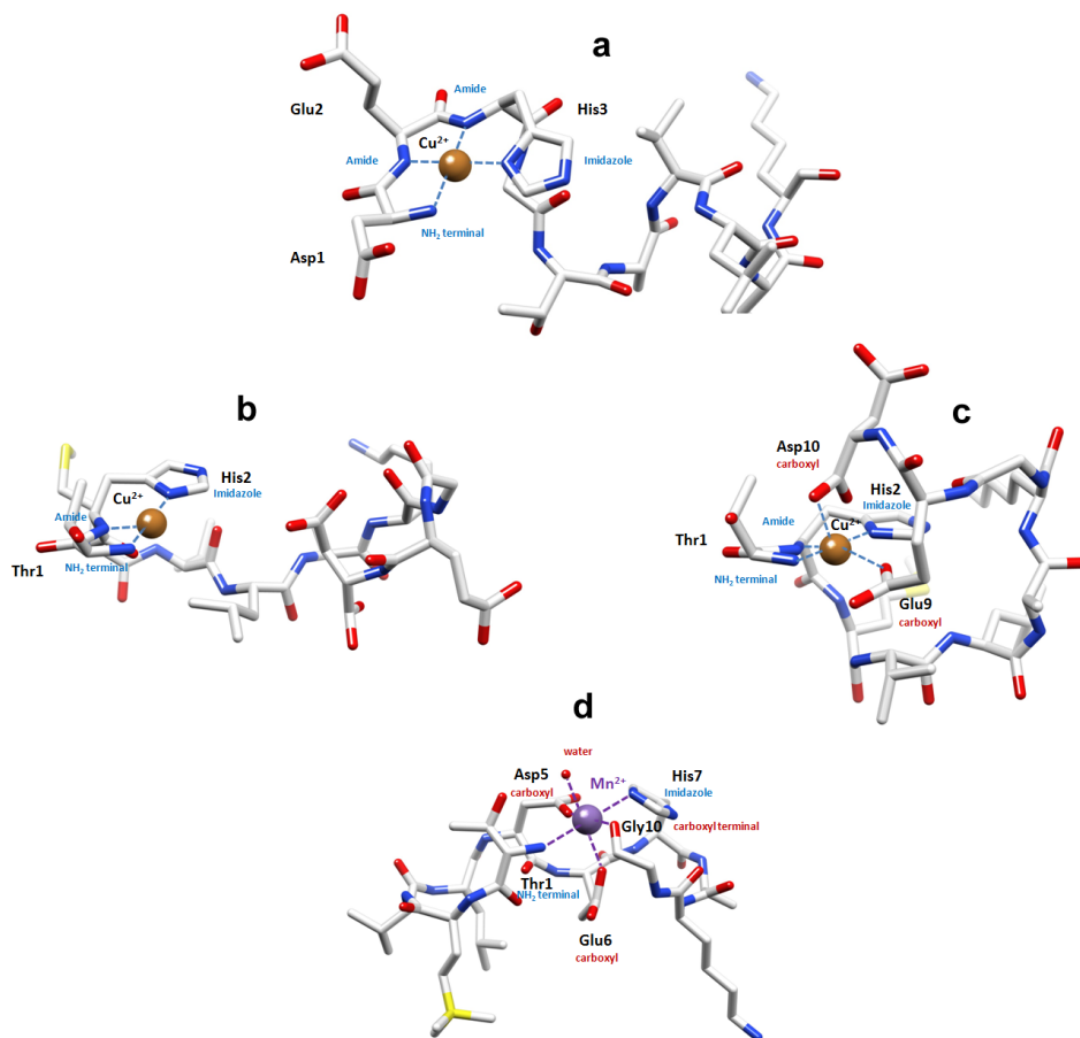

**Figure S19.** Structural models of a) DP1-Cu in 4N{ $N_{\text{term}}$ ,  $N_{\text{im}}$ , 2 $N_{\text{amide}}$ } *albumin-like*, b) DP2-Cu in 3N { $N_{\text{term}}$ ,  $N_{\text{im}}$ ,  $N_{\text{amide}}$ }, c) DP2-Cu in 3N2O {  $N_{\text{term}}$ ,  $N_{\text{im}}$ ,  $N_{\text{amide}}$ , 2O}, and d) Mid-DEH-Mn in 2N4O { $N_{\text{term}}$ ,  $N_{\text{im}}$ , 4O} coordination modes, respectively. The proposed models should be taken with appropriate caution, since they were constructed by selective imposition of a number of constraints; however, they can still represent an interesting structural hypothesis for the complexes formed in solution, in agreement with experimental evidences..

For Cu(II)-DP1 model a), the Cu(II) ion was constrained in a 4N square planar coordination mode using the metal-donor distances and backbone dihedral angles derived from X-ray crystal structures of aqua-((aspartic acid)-alanyl-histidinyl-lysiny)-copper(II) chloride hexahydrate (CSD Entry: OZEBOL). Moreover, meaningful ROEs involving a through-space correlation of the side-chain aliphatic protons of Glu-3 with the aromatic and aliphatic  $\beta$ -protons of His-3 were also used and introduced as constraints for model generation. These through-space correlations were evaluated using diamagnetic Ni(II) (at pH 10) to probe paramagnetic Cu(II) in the same square planar coordination mode. The geometry of the rest of the peptide was optimized without any constraints allowing all the atoms, bonds and dihedral angles to change simultaneously to reach the lowest overall energy within the HyperChem<sup>TM</sup> 8.0.3 program (Hypercube, Inc., Gainesville, FL, 2007). For Cu(II)-DP2 (b model), the Cu(II) ion was constrained in a 3N planar coordination involving  $N_{\text{term}}$  from Thr-1 and  $N_{\text{im}}$  and  $N_{\text{amide}}$  from His-2. The N-Cu(II) distances were derived from the same template (CSD Entry: OZEBOL). Moreover, in c model, additional constraints were imposed to the carboxylic oxygen donors of Asp-9 and Glu-10 in order to be connected to the metal ion. The other residues and backbone dihedral angles have been left free to move. As for the d model, Mn(II) bound in an octahedral { $N_{\text{term}}$ ,  $N_{\text{im}}$ , 4O} coordination mode with Thr-1 ( $N_{\text{term}}$ ), Asp-5 (O), Glu-6 (O), His-7 ( $N_{\text{im}}$ ), Gly-10 (O) and H<sub>2</sub>O, the metal-donor distances were chosen using those found in the structure of MNTR mutant E11K complexed with Mn<sup>2+</sup> in octahedral geometry (PDB 4HX4) while the position of all the other atoms and backbone dihedral angles were optimized without any constraints.

## Tables

**Table S1.**  $^1\text{H}$  and  $^{13}\text{C}$  resonance assignment ( $\delta$  ppm) for DEHGTAVMLK (DP1), THMVLAKGED (DP2), GTAVMLKDEH (Term-DEH), TMVLDEHAKG (Mid-DEH) and DEHGGGGDEH (Bis-DEH) peptides.

| <b>DEHGTAVMLK (DP1), pH 7.2</b> |           |           |           |           |           |           |           |           |           |            |
|---------------------------------|-----------|-----------|-----------|-----------|-----------|-----------|-----------|-----------|-----------|------------|
| <b>Nucleus\residue</b>          | <b>D1</b> | <b>E2</b> | <b>H3</b> | <b>G4</b> | <b>T5</b> | <b>A6</b> | <b>V7</b> | <b>M8</b> | <b>L9</b> | <b>K10</b> |
| CA                              | 51.12     | 54.02     | 53.76     | 42.82     | 59.25     | 49.91     | 59.63     | 52.44     | 52.49     | 54.87      |
| CB                              | 38.04     | 27.43     | 27.95     |           | 67.06     | 16.47     | 30.16     | 29.27     | 39.54     | 31.16      |
| CD                              |           |           |           |           |           |           |           |           |           | 26.43      |
| CD1                             |           |           |           |           |           |           |           |           | 22.27     |            |
| CD2                             |           |           | 117.40    |           |           |           |           |           | 20.67     |            |
| CE                              |           |           |           |           |           |           |           | 14.25     |           | 39.50      |
| CE1                             |           |           | 135.60    |           |           |           |           |           |           |            |
| CG                              |           | 33.24     |           |           | 18.89     |           |           | 30.15     | 24.16     | 21.98      |
| CG1                             |           |           |           |           |           |           | 18.31     |           |           |            |
| CG2                             |           |           |           |           |           |           | 17.77     |           |           |            |
| HA                              | 4.047     | 4.206     | 4.570     |           | 4.237     | 4.279     | 3.972     | 4.425     | 4.290     | 4.082      |
| HB                              |           |           |           |           | 4.142     |           | 1.954     |           |           |            |
| HB2                             | 2.682     | 1.886     | 3.119     |           |           |           |           | 2.513     |           | 1.729      |
| HB3                             | 2.592     | 1.777     | 3.013     |           |           |           |           | 2.438     |           | 1.617      |
| HD2                             |           |           | 6.976     |           |           |           |           |           |           |            |
| HE1                             |           |           | 7.815     |           |           |           |           |           |           |            |
| HG                              |           |           |           |           |           |           |           |           | 1.542     |            |
| HN                              |           |           |           | 8.272     | 8.026     | 8.258     | 8.001     | 8.310     | 8.203     | 7.760      |
| QA                              |           |           |           | 3.921     |           |           |           |           |           |            |
| QB                              |           |           |           |           |           | 1.302     |           |           | 1.542     |            |
| QD                              |           |           |           |           |           |           |           |           |           | 1.586      |
| QD1                             |           |           |           |           |           |           |           |           | 0.843     |            |
| QD2                             |           |           |           |           |           |           |           |           | 0.785     |            |
| QE                              |           |           |           |           |           |           |           | 2.013     |           | 2.913      |
| QG                              |           | 2.053     |           |           | 1.131     |           |           | 1.947     |           | 1.301      |
| QG1                             |           |           |           |           |           |           | 0.840     |           |           |            |

**THMVLAAGED (DP2), pH 7.3**

| <b>Nucleus\residue</b> | <b>T1</b> | <b>H2</b> | <b>M3</b> | <b>V4</b> | <b>L5</b> | <b>A6</b> | <b>K7</b> | <b>G8</b> | <b>E9</b> | <b>D10</b> |
|------------------------|-----------|-----------|-----------|-----------|-----------|-----------|-----------|-----------|-----------|------------|
| CA                     | 59.51     | 53.63     | 52.68     | 59.63     | 52.05     | 49.48     | 53.66     | 42.46     | 53.45     | 52.11      |
| CB                     | 68.00     | 28.46     | 29.09     | 30.12     | 39.77     | 16.56     | 30.48     |           | 27.85     | 39.50      |
| CD                     |           |           |           |           |           |           | 26.37     |           |           |            |
| CD1                    |           |           |           |           | 22.14     |           |           |           |           |            |
| CD2                    |           | 116.90    |           |           | 20.78     |           |           |           |           |            |
| CE                     |           |           | 14.16     |           |           |           | 39.36     |           |           |            |
| CE1                    |           | 136.00    |           |           |           |           |           |           |           |            |
| CG                     | 18.44     |           | 30.32     |           | 24.20     |           | 21.68     |           | 33.61     |            |
| CG1                    |           |           |           | 18.46     |           |           |           |           |           |            |
| CG2                    |           |           |           | 17.87     |           |           |           |           |           |            |
| HA                     | 3.435     | 4.564     | 4.367     | 3.973     | 4.292     | 4.240     | 4.232     |           | 4.285     | 4.287      |
| HA1                    |           |           |           |           |           |           |           | 3.853     |           |            |
| HA2                    |           |           |           |           |           |           |           | 3.970     |           |            |
| HB                     | 3.952     |           |           | 1.931     |           |           |           |           |           |            |
| HB2                    |           | 3.000     | 2.395     |           |           |           | 1.739     |           | 2.047     | 2.586      |
| HB3                    |           | 2.996     | 2.365     |           |           |           | 1.695     |           | 1.816     | 2.477      |
| HD2                    |           | 6.903     |           |           |           |           |           |           |           |            |
| HE1                    |           | 7.700     |           |           |           |           |           |           |           |            |
| HG                     |           |           |           |           | 1.517     |           |           |           |           |            |
| HN                     |           |           |           | 8.134     | 8.263     | 8.213     | 8.234     | 8.384     | 8.208     | 7.964      |
| QB                     |           |           |           |           | 1.514     | 1.282     |           |           |           |            |
| QD                     |           |           |           |           |           |           | 1.605     |           |           |            |
| QD1                    |           |           |           |           | 0.836     |           |           |           |           |            |
| QD2                    |           |           |           |           | 0.783     |           |           |           |           |            |
| QE                     |           |           | 2.002     |           |           |           | 2.931     |           |           |            |
| QG                     | 1.111     |           | 1.893     |           |           |           | 1.382     |           | 2.159     |            |

**GTAVMLKDEH (Term-DEH), pH 7.4**

| <b>Nucleus\residue</b> | <b>G1</b> | <b>T2</b> | <b>A3</b> | <b>V4</b> | <b>M5</b> | <b>L6</b> | <b>K7</b> | <b>D8</b> | <b>E9</b> | <b>H10</b> |
|------------------------|-----------|-----------|-----------|-----------|-----------|-----------|-----------|-----------|-----------|------------|
| CA                     | 41.27     | 59.21     | 49.87     | 59.66     | 52.54     | 52.40     | 53.56     | 51.75     | 53.81     | 54.62      |
| CB                     |           | 67.19     | 16.58     | 30.24     | 29.27     | 39.61     | 30.50     | 38.46     | 27.94     | 28.02      |
| CD                     |           |           |           |           |           |           | 26.40     |           |           |            |
| CD1                    |           |           |           |           |           | 22.21     |           |           |           |            |
| CD2                    |           |           |           |           |           | 20.74     |           |           |           | 117.50     |
| CE                     |           |           |           |           | 14.28     |           | 39.40     |           |           |            |
| CE1                    |           |           |           |           |           |           |           |           |           | 134.30     |
| CG                     |           | 18.91     |           |           | 30.27     | 24.25     | 21.76     |           | 33.58     |            |
| CG1                    |           |           |           | 18.23     |           |           |           |           |           |            |
| CG2                    |           |           |           | 17.93     |           |           |           |           |           |            |
| HA                     |           | 4.277     | 4.293     | 3.980     | 4.428     | 4.285     | 4.234     | 4.528     | 4.198     | 4.353      |
| HB                     |           | 4.120     |           | 1.951     |           |           |           |           |           |            |
| HB2                    |           |           |           |           | 2.502     | 1.527     | 1.714     | 2.617     | 1.939     | 3.129      |
| HB3                    |           |           |           |           | 2.439     | 1.493     | 1.674     | 2.491     | 1.777     | 2.980      |
| HD2                    |           |           |           |           |           |           |           |           |           | 7.022      |
| HE1                    |           |           |           |           |           |           |           |           |           | 8.120      |
| HG                     |           |           |           |           |           | 1.546     |           |           |           |            |
| HN                     |           |           | 8.265     | 8.086     | 8.361     | 8.262     | 8.215     | 8.292     | 8.169     | 7.909      |
| QA                     | 3.758     |           |           |           |           |           |           |           |           |            |
| QB                     |           |           | 1.305     |           |           |           |           |           |           |            |
| QD                     |           |           |           |           |           |           | 1.599     |           |           |            |
| QD1                    |           |           |           |           |           | 0.841     |           |           |           |            |
| QD2                    |           |           |           |           |           | 0.786     |           |           |           |            |
| QE                     |           |           |           |           | 2.021     |           | 2.916     |           |           |            |
| QG                     |           | 1.148     |           |           | 1.939     |           | 1.322     |           | 2.094     |            |
| QG1                    |           |           |           | 0.844     |           |           |           |           |           |            |

**TMVLDEHAKG (Mid-DEH), pH 7.2**

| <b>Nucleus\residue</b> | <b>T1</b> | <b>M2</b> | <b>V3</b> | <b>L4</b> | <b>D5</b> | <b>E6</b> | <b>H7</b> | <b>A8</b> | <b>K9</b> | <b>G10</b> |
|------------------------|-----------|-----------|-----------|-----------|-----------|-----------|-----------|-----------|-----------|------------|
| CA                     | 59.54     | 52.94     | 59.67     | 52.32     | 51.27     | 54.51     | 53.39     | 49.93     | 53.60     | 43.45      |
| CB                     | 67.86     | 29.08     | 30.32     | 39.87     | 38.56     | 27.33     | 27.54     | 16.42     | 30.38     |            |
| CD                     |           |           |           |           |           |           |           |           | 26.34     |            |
| CD1                    |           |           |           | 22.13     |           |           |           |           |           |            |
| CD2                    |           |           |           | 20.83     |           |           | 117.40    |           |           |            |
| CE                     |           | 14.22     |           |           |           |           |           |           | 39.48     |            |
| CE1                    |           |           |           |           |           |           | 135.40    |           |           |            |
| CG                     | 18.66     | 30.32     |           | 24.36     |           | 33.41     |           |           | 21.97     |            |
| CG1                    |           |           | 18.43     |           |           |           |           |           |           |            |
| CG2                    |           |           | 17.99     |           |           |           |           |           |           |            |
| HA                     | 3.489     | 4.463     | 4.015     | 4.290     | 4.505     | 4.069     | 4.536     | 4.229     | 4.269     |            |
| HB                     | 3.962     |           | 1.954     |           |           |           |           |           |           |            |
| HB2                    |           |           |           |           | 2.601     | 1.837     | 3.125     |           | 1.816     |            |
| HB3                    |           |           |           |           | 2.533     | 1.791     | 3.016     |           | 1.701     |            |
| HD2                    |           |           |           |           |           |           | 7.010     |           |           |            |
| HE1                    |           |           |           |           |           |           | 7.899     |           |           |            |
| HG                     |           |           |           | 1.506     |           |           |           |           |           |            |
| HN                     |           |           | 8.263     | 8.308     | 8.204     | 8.438     | 8.235     | 7.953     | 8.190     | 7.880      |
| QA                     |           |           |           |           |           |           |           |           |           | 3.690      |
| QB                     |           | 2.481     |           | 1.499     |           |           |           | 1.318     |           |            |
| QD                     |           |           |           |           |           |           |           |           | 1.618     |            |
| QD1                    |           |           |           | 0.836     |           |           |           |           |           |            |
| QD2                    |           |           |           | 0.787     |           |           |           |           |           |            |
| QE                     |           | 2.027     |           |           |           |           |           |           | 2.930     |            |
| QG                     | 1.151     | 1.952     |           |           |           | 2.002     |           |           | 1.395     |            |
| QG1                    |           |           | 0.837     |           |           |           |           |           |           |            |

| <b>DEHGGGGDEH (Bis-DEH), pH 7.0</b> |           |           |           |              |           |           |            |
|-------------------------------------|-----------|-----------|-----------|--------------|-----------|-----------|------------|
| <b>Nucleus/residue</b>              | <b>D1</b> | <b>E2</b> | <b>H3</b> | <b>G4-G7</b> | <b>D8</b> | <b>E9</b> | <b>H10</b> |
| <b>CA</b>                           | 50.96     | 54.18     | 53.42     | 42.60        | 51.54     | 54.09     | 54.34      |
| <b>CB</b>                           | 37.57     | 27.43     | 27.47     |              | 38.57     | 27.44     | 27.48      |
| <b>CD2</b>                          |           |           | 117.50    |              |           |           | 117.30     |
| <b>CE1</b>                          |           |           | 135.00    |              |           |           | 133.70     |
| <b>CG</b>                           |           | 33.30     |           |              |           | 33.43     |            |
| <b>HA</b>                           | 4.118     | 4.221     | 4.608     |              | 4.543     | 4.156     | 4.376      |
| <b>HB2</b>                          |           | 1.911     | 3.160     |              | 2.602     | 1.924     | 3.159      |
| <b>HB3</b>                          |           | 1.792     | 3.062     |              | 2.488     | 1.798     | 3.002      |
| <b>HD2</b>                          |           |           | 7.069     |              |           |           | 7.090      |
| <b>HE1</b>                          |           |           | 8.044     |              |           |           | 8.332      |
| <b>HN</b>                           |           |           | 8.419     | 8.347        | 8.255     | 8.257     | 7.955      |
| <b>QA</b>                           |           |           |           | 3.925        |           |           |            |
| <b>QB</b>                           | 2.695     |           |           |              |           |           |            |
| <b>QG</b>                           |           | 2.077     |           |              |           | 2.119     |            |



**Table S2.** Spectroscopic parameters and coordination modes for the Cu(II):peptide systems.

| DP1<br>DEHGTAVMLK                                                      | UV-Vis <sup>a</sup> |           |            | CD <sup>a</sup> |                          |                                | EPR  |                 |                 | Complex | Donors                                                                                              | NMR     |                                                                                                                                               |
|------------------------------------------------------------------------|---------------------|-----------|------------|-----------------|--------------------------|--------------------------------|------|-----------------|-----------------|---------|-----------------------------------------------------------------------------------------------------|---------|-----------------------------------------------------------------------------------------------------------------------------------------------|
|                                                                        | pH                  | $\lambda$ | $\epsilon$ | pH              | $\lambda$                | $\Delta\epsilon$               | pH   | $A_{\parallel}$ | $g_{\parallel}$ |         |                                                                                                     | pH      | Residue donors                                                                                                                                |
| DP1 species<br>[CuH <sub>2</sub> L] <sup>2+</sup> -[CuHL] <sup>+</sup> |                     |           |            |                 |                          |                                | 3.85 | 155.0           | 2.33            |         | Not determined                                                                                      |         |                                                                                                                                               |
| [CuL]                                                                  |                     |           |            |                 |                          |                                | 4.95 | 208.7           | 2.18            | 4N      | {N <sub>term</sub> <sup>-</sup> , N <sub>im</sub> <sup>-</sup> , 2N <sub>amide</sub> <sup>-</sup> } | 4.3     | {D1 N <sub>term</sub> <sup>-</sup> , E2 N <sub>amide</sub> <sup>-</sup> , H3 N <sub>im</sub> <sup>-</sup> , N <sub>amide</sub> <sup>-</sup> } |
| [CuLH <sub>1</sub> ] <sup>-</sup>                                      | 7.04                | 525       | 297        | 7.04            | 560<br>485<br>310<br>272 | -0.65<br>0.43<br>1.20<br>-2.80 | 7.20 | 208.7           | 2.18            | 4N      | {N <sub>term</sub> <sup>-</sup> , N <sub>im</sub> <sup>-</sup> , 2N <sub>amide</sub> <sup>-</sup> } | 7.0-7.6 | {D1 N <sub>term</sub> <sup>-</sup> , E2 N <sub>amide</sub> <sup>-</sup> , H3 N <sub>im</sub> <sup>-</sup> , N <sub>amide</sub> <sup>-</sup> } |
| [CuLH <sub>2</sub> ] <sup>2-</sup>                                     | 10.02               | 525       | 325        | 10.05           | 560<br>485<br>310<br>272 | -0.77<br>0.43<br>1.20<br>-2.80 | 9.85 | 208.7           | 2.18            | 4N      | {N <sub>term</sub> <sup>-</sup> , N <sub>im</sub> <sup>-</sup> , 2N <sub>amide</sub> <sup>-</sup> } | 9       | {D1 N <sub>term</sub> <sup>-</sup> , E2 N <sub>amide</sub> <sup>-</sup> , H3 N <sub>im</sub> <sup>-</sup> , N <sub>amide</sub> <sup>-</sup> } |
| [CuLH <sub>3</sub> ] <sup>3-</sup>                                     | 10.95               | 525       | 339        | 11.07           | 560<br>485<br>310<br>272 | -0.84<br>0.43<br>1.20<br>-2.80 |      |                 |                 | 4N      | {N <sub>term</sub> <sup>-</sup> , N <sub>im</sub> <sup>-</sup> , 2N <sub>amide</sub> <sup>-</sup> } | 10.0    | {D1 N <sub>term</sub> <sup>-</sup> , E2 N <sub>amide</sub> <sup>-</sup> , H3 N <sub>im</sub> <sup>-</sup> , N <sub>amide</sub> <sup>-</sup> } |

<sup>a</sup>The reported errors on  $\lambda_{\max} = \pm 2$  nm,  $\epsilon = \pm 5\%$ .

| DP2<br>THMVLAKGED      | UV-Vis    |           |            | CD             |           |                  | EPR            |                |                | Complex                   | Donors                                                                            | NMR           |                                                                                                                                                                                          |
|------------------------|-----------|-----------|------------|----------------|-----------|------------------|----------------|----------------|----------------|---------------------------|-----------------------------------------------------------------------------------|---------------|------------------------------------------------------------------------------------------------------------------------------------------------------------------------------------------|
|                        | pH        | $\lambda$ | $\epsilon$ | pH             | $\lambda$ | $\Delta\epsilon$ | pH             | $A_{\text{H}}$ | $g_{\text{H}}$ |                           |                                                                                   | pH            | Residue donors                                                                                                                                                                           |
| DP2 species            |           |           |            |                |           |                  | 3.13           | 119.27         | 2.414          | $\text{Cu}_{(\text{aq})}$ |                                                                                   | DP2:Cu 1:0.02 |                                                                                                                                                                                          |
| $[\text{CuHL}]^+$      | 4.58      | 597       | 169        | 4.34           | 585       | 0.22             | 4.55           | 190.0          | 2.225          | 3N                        | $\{\text{N}_{\text{term}}^-, \text{N}_{\text{im}}^-, \text{N}_{\text{amide}}^-\}$ | 4.25          | $\{\text{H2 N}_{\text{im}}^-, (\text{E9 O}_{\text{carb}}^-, \text{D10 O}_{\text{carb}}^-)\}$                                                                                             |
|                        |           |           |            |                | 300       | -0.74            |                |                |                |                           |                                                                                   |               |                                                                                                                                                                                          |
|                        |           |           |            |                | 265       | 0.76             |                |                |                |                           |                                                                                   |               |                                                                                                                                                                                          |
| $[\text{CuL}]$         | 7.55-8.17 | 595       | 210        | 6.2-8.2        | 585       | 0.22             | 6.95           | 190.0          | 2.225          | 3N                        | $\{\text{N}_{\text{term}}^-, \text{N}_{\text{im}}^-, \text{N}_{\text{amide}}^-\}$ | 7.0           | $\{\text{T1 N}_{\text{term}}^-, \text{H2 N}_{\text{im}}^-, \text{N}_{\text{amide}}^-, (\text{E9 O}_{\text{carb}}^-, \text{D10 O}_{\text{carb}}^-)\}$                                     |
|                        |           |           |            |                | 300       | -0.74            |                |                |                |                           |                                                                                   |               |                                                                                                                                                                                          |
|                        |           |           |            |                | 265       | 1.06             |                |                |                |                           |                                                                                   |               |                                                                                                                                                                                          |
| $[\text{CuLH}_1]^-$    | 7.55-8.17 | 595       | 210        | Not determined |           |                  | 9.08           | 190.0          | 2.225          | 3N                        | $\{\text{N}_{\text{term}}^-, 2\text{N}_{\text{amide}}^-\}$                        |               |                                                                                                                                                                                          |
| $[\text{CuLH}_2]^{2-}$ | 10.0      | 540       | 251        | 10.1           | 620       | -0.24            |                |                |                | 4N                        | $\{\text{N}_{\text{term}}^-, 3\text{N}_{\text{amide}}^-\}$                        | 10.1          | $\{\text{T1 N}_{\text{term}}^-, \text{H2 N}_{\text{amide}}^-, \text{M3 N}_{\text{amide}}^-, \text{V4 N}_{\text{amide}}^-, (\text{E9 O}_{\text{carb}}^-, \text{D10 O}_{\text{carb}}^-)\}$ |
|                        |           |           |            |                | 537       | 0.55             |                |                |                |                           |                                                                                   |               |                                                                                                                                                                                          |
|                        |           |           |            |                | 290.0     | -1.62            |                |                |                |                           |                                                                                   |               |                                                                                                                                                                                          |
| $[\text{CuLH}_3]^{2-}$ | 10.8      | 530       | 262        | 11.06          | 620       | -0.24            | Not determined |                |                | 4N                        | $\{\text{N}_{\text{term}}^-, 3\text{N}_{\text{amide}}^-\}$                        |               |                                                                                                                                                                                          |
|                        |           |           |            |                | 537       | 0.36             |                |                |                |                           |                                                                                   |               |                                                                                                                                                                                          |
|                        |           |           |            |                | 290       | -1.62            |                |                |                |                           |                                                                                   |               |                                                                                                                                                                                          |

| Term-DEH<br>GTAVMLKDEH        | UV-Vis         |           |            | CD             |           |                  | EPR            |                 |                 | Complex                   | donors                                                                        | NMR  |                                                                                                                                           |
|-------------------------------|----------------|-----------|------------|----------------|-----------|------------------|----------------|-----------------|-----------------|---------------------------|-------------------------------------------------------------------------------|------|-------------------------------------------------------------------------------------------------------------------------------------------|
|                               | pH             | $\lambda$ | $\epsilon$ | pH             | $\lambda$ | $\Delta\epsilon$ | pH             | $A_{\parallel}$ | $g_{\parallel}$ |                           |                                                                               | pH   | Residue donors                                                                                                                            |
| Term-DEH species              |                |           |            |                |           |                  | 2.80-3.09      | 119.30          | 2.416           | $\text{Cu}_{(\text{aq})}$ |                                                                               |      | Term-DEH:Cu 1:0.02                                                                                                                        |
| $[\text{CuH}_2\text{L}]^{2+}$ | 4.96           | 715       | 25         | Not determined |           |                  | 5.13           | 140             | 2.320           | 1N                        | $\{\text{N}_{\text{im}}\}$                                                    | 5.12 | $\{\text{D8 O}^{\text{carb}}, \text{H10 N}_{\text{im}}\}$                                                                                 |
| $[\text{CuHL}]^+$             | 6.05           | 660       | 60         | 6.12           | 695       | -0.07            | 5.97           | 160             | 2.290           | 2N                        | $\{\text{N}_{\text{term}}, \text{N}_{\text{im}}\}$                            | 6.30 | $\{\text{G1 N}_{\text{term}}, \text{D8 O}^{\text{carb}}, \text{H10 N}_{\text{im}}, \text{N}_{\text{amide}}\}$                             |
|                               |                |           |            |                | 320       | 0.25             |                |                 |                 |                           |                                                                               |      |                                                                                                                                           |
|                               |                |           |            |                | 270       | -0.25            |                |                 |                 |                           |                                                                               |      |                                                                                                                                           |
| $[\text{CuL}]$                | 7.44           | 625       | 96         | 8.00           | 680       | -0.21            | 7.84-8.78      | 169             | 2.230           | 3N                        | $\{\text{N}_{\text{term}}, \text{N}_{\text{im}}, \text{N}_{\text{amide}}\}$   | 7.4  | $\{\text{G1 N}_{\text{term}}, \text{D8 O}^{\text{carb}}, \text{H10 N}_{\text{im}}, \text{N}_{\text{amide}}\}$                             |
|                               |                |           |            |                | 320       | 0.62             |                |                 |                 |                           |                                                                               |      |                                                                                                                                           |
|                               |                |           |            |                | 270       | -0.69            |                |                 |                 |                           |                                                                               |      |                                                                                                                                           |
| $[\text{CuLH}_1]^-$           | Not determined |           |            | Not determined |           |                  | Not determined |                 |                 | Not determined            |                                                                               | 9.0  | $\{\text{G1 N}_{\text{term}}, \text{D8 O}^{\text{carb}}, \text{E9 N}_{\text{amide}}, \text{H10 N}_{\text{im}}, \text{N}_{\text{amide}}\}$ |
| $[\text{CuLH}_2]^{2-}$        | 10.31          | 520       | 162        | 10.06          | 540       | -1.06            | 10.07          | 204             | 2.185           | 4N                        | $\{\text{N}_{\text{term}} / \text{N}_{\text{im}}, 3\text{N}_{\text{amide}}\}$ | 10.1 | $\{\text{G1 N}_{\text{term}}, \text{D8 N}_{\text{amide}}, \text{E9 N}_{\text{amide}}, \text{H10 N}_{\text{amide}}\}$                      |
|                               |                |           |            |                | 310       | 1.1              |                |                 |                 |                           |                                                                               |      |                                                                                                                                           |
|                               |                |           |            |                | 275       | -2.61            |                |                 |                 |                           |                                                                               |      |                                                                                                                                           |
|                               |                |           |            |                | 250       | 1.45             |                |                 |                 |                           |                                                                               |      |                                                                                                                                           |
| $[\text{CuLH}_3]^{3-}$        | 11.01          | 520       | 170        | 11.03          | 537       | -1.11            | 10.97          | 204             | 2.185           | 4N                        | $\{\text{N}_{\text{term}} / \text{N}_{\text{im}}, 3\text{N}_{\text{amide}}\}$ |      |                                                                                                                                           |
|                               |                |           |            |                | 310       | 1.14             |                |                 |                 |                           |                                                                               |      |                                                                                                                                           |
|                               |                |           |            |                | 275       | -2.75            |                |                 |                 |                           |                                                                               |      |                                                                                                                                           |

| Mid-DEH<br>TMVLDEHAKG         | UV-Vis |           |            | CD    |           |                  | EPR       |                 |                 | Complex                   | Donors                                                                      | NMR               |                                                                                                                |
|-------------------------------|--------|-----------|------------|-------|-----------|------------------|-----------|-----------------|-----------------|---------------------------|-----------------------------------------------------------------------------|-------------------|----------------------------------------------------------------------------------------------------------------|
|                               | pH     | $\lambda$ | $\epsilon$ | pH    | $\lambda$ | $\Delta\epsilon$ | pH        | $A_{\parallel}$ | $g_{\parallel}$ |                           |                                                                             | pH                | Residue donors                                                                                                 |
| Mid-DEH species               |        |           |            |       |           |                  | 3.17-4.19 | 119.3           | 2.416           | $\text{Cu}_{(\text{aq})}$ |                                                                             | Mid-DEH:Cu 1:0.02 |                                                                                                                |
| $[\text{CuH}_2\text{L}]^{2+}$ | 4.85   | 710       | 37         | 5.22  | 630       | -0.13            | 5.14      | 151.9           | 2.323           | 1N                        | $\{\text{N}_{\text{im}}\}$                                                  | 4.9               | $\{\text{D5O}^-_{\text{carb}}, \text{H7 N}_{\text{im}}, \text{G10 O}^-_{\text{term-carb}}\}$                   |
|                               |        |           |            |       | 340       | 0.10             |           |                 |                 |                           |                                                                             |                   |                                                                                                                |
|                               |        |           |            |       | 235       | -2.34            |           |                 |                 |                           |                                                                             |                   |                                                                                                                |
| $[\text{CuHL}]^+$             | 5.34   | 655       | 62         | 5.22  | 630       | -0.13            |           |                 |                 | 2N                        | $\{\text{N}_{\text{term}}, \text{N}_{\text{im}}\}$                          | 5.5               | $\{\text{D5O}^-_{\text{carb}}, \text{H7 N}_{\text{im}}, \text{G10 O}^-_{\text{term-carb}}\}$                   |
|                               |        |           |            |       | 340       | 0.10             |           |                 |                 |                           |                                                                             |                   |                                                                                                                |
|                               |        |           |            |       | 235       | -2.34            |           |                 |                 |                           |                                                                             |                   |                                                                                                                |
|                               |        |           |            | 5.98  | 630       | -0.37            |           |                 |                 |                           |                                                                             |                   |                                                                                                                |
|                               |        |           |            |       | 335       | 0.24             |           |                 |                 |                           |                                                                             |                   |                                                                                                                |
|                               |        |           |            |       | 240       | -1.0             |           |                 |                 |                           |                                                                             |                   |                                                                                                                |
| $[\text{CuL}]$                | 7.56   | 617       | 150        | 6.47  | 610       | -0.55            | 6.24      | 170             | 2.218           | 3N                        | $\{\text{N}_{\text{term}}, \text{N}_{\text{im}}, \text{N}_{\text{amide}}\}$ | 7.2               | $\{\text{T1 N}_{\text{term}}, \text{D5 O}^-_{\text{carb}}, \text{H7 N}_{\text{im}}, \text{N}_{\text{amide}}\}$ |
|                               |        |           |            |       | 335       | 0.32             |           |                 |                 |                           |                                                                             |                   |                                                                                                                |
|                               |        |           |            |       | 285       | -0.17            |           |                 |                 |                           |                                                                             |                   |                                                                                                                |
|                               |        |           |            |       | 245       | -0.66            |           |                 |                 |                           |                                                                             |                   |                                                                                                                |
|                               |        |           |            | 7.01  | 610       | -0.56            |           |                 |                 |                           |                                                                             |                   |                                                                                                                |
|                               |        |           |            |       | 335       | 0.32             |           |                 |                 |                           |                                                                             |                   |                                                                                                                |
|                               |        |           |            |       | 285       | -0.19            |           |                 |                 |                           |                                                                             |                   |                                                                                                                |
|                               |        |           |            | 8.29  | 610       | -0.56            |           |                 |                 |                           |                                                                             |                   |                                                                                                                |
|                               |        |           |            |       | 335       | 0.33             |           |                 |                 |                           |                                                                             |                   |                                                                                                                |
|                               |        |           |            |       | 290       | -0.21            |           |                 |                 |                           |                                                                             |                   |                                                                                                                |
|                               |        |           |            |       | 260       | 0.60             |           |                 |                 |                           |                                                                             |                   |                                                                                                                |
| $[\text{CuLH}_1]^-$           | 9.00   | 590       | 139        | 9.1   | 615       | -0.38            | 9.37      | 170             | 2.218           | 3N                        | $\{\text{N}_{\text{im}}, 2\text{N}_{\text{amide}}\}$                        | 9.0               | $\{\text{D5 N}_{\text{amide}}, \text{H7 N}_{\text{im}}, \text{N}_{\text{amide}}\}$                             |
|                               |        |           |            |       | 325       | 0.12             |           |                 |                 |                           |                                                                             |                   |                                                                                                                |
|                               |        |           |            |       | 293       | -0.18            |           |                 |                 |                           |                                                                             |                   |                                                                                                                |
|                               |        |           |            |       | 258       | 1.98             |           |                 |                 |                           |                                                                             |                   |                                                                                                                |
| $[\text{CuLH}_2]^{2-}$        | 10.48  | 520       | 170        | 10.1  | 532       | -0.64            | 10.54     | 204             | 2.172           | 4N                        | $\{\text{N}_{\text{im}}, 3\text{N}_{\text{amide}}\}$                        |                   |                                                                                                                |
|                               |        |           |            |       | 350       | -0.23            |           |                 |                 |                           |                                                                             |                   |                                                                                                                |
|                               |        |           |            |       | 313       | 0.35             |           |                 |                 |                           |                                                                             |                   |                                                                                                                |
|                               |        |           |            |       | 285       | -0.60            |           |                 |                 |                           |                                                                             |                   |                                                                                                                |
|                               |        |           |            |       | 260       | 2.05             |           |                 |                 |                           |                                                                             |                   |                                                                                                                |
| $[\text{CuLH}_3]^{3-}$        | 11.00  | 520       | 178        | 11.04 | 530       | -0.91            | 11.34     | 204             | 2.172           | 4N                        | $\{\text{N}_{\text{im}}, 3\text{N}_{\text{amide}}\}$                        |                   |                                                                                                                |
|                               |        |           |            |       | 350       | -0.19            |           |                 |                 |                           |                                                                             |                   |                                                                                                                |
|                               |        |           |            |       | 312       | 0.57             |           |                 |                 |                           |                                                                             |                   |                                                                                                                |
|                               |        |           |            |       | 280       | -0.90            |           |                 |                 |                           |                                                                             |                   |                                                                                                                |
|                               |        |           |            |       | 258       | 1.80             |           |                 |                 |                           |                                                                             |                   |                                                                                                                |

| Bis-DEH 1:1<br>DEHGGGGDEH     | UV-Vis         |           |            | CD             |           |                  | EPR            |                 |                 | Complex                   | Donors                                                                             | NMR                    |                                                                                                                       |
|-------------------------------|----------------|-----------|------------|----------------|-----------|------------------|----------------|-----------------|-----------------|---------------------------|------------------------------------------------------------------------------------|------------------------|-----------------------------------------------------------------------------------------------------------------------|
|                               | pH             | $\lambda$ | $\epsilon$ | pH             | $\lambda$ | $\Delta\epsilon$ | pH             | $A_{\parallel}$ | $g_{\parallel}$ |                           |                                                                                    | pH                     | Residue donors                                                                                                        |
| Bis-DEH species               |                |           |            |                |           |                  | 3.18           | 119.3           | 2.416           | $\text{Cu}_{(\text{aq})}$ |                                                                                    |                        |                                                                                                                       |
| $[\text{CuH}_2\text{L}]^{2+}$ | 4.1            | 728       | 21         |                |           |                  | 4.11           | 161             | 2.315           | 1N                        | $\{\text{N}_{\text{im}}^-\}$                                                       | 3.86-4.48              | NA (severe broadening)                                                                                                |
| $[\text{CuL}]$                | Not determined |           |            | Not determined |           |                  | Not determined |                 |                 | Not determined            |                                                                                    | NA (severe broadening) |                                                                                                                       |
| $[\text{CuLH}_1^-]$           | 6.4-9.8        | 521       | 172        | 6.4-9.8        | 560       | 0.66             | 6.1-9.2        | 207             | 2.170           | 4N                        | $\{\text{N}_{\text{term}}^-, \text{N}_{\text{im}}^-, 2\text{N}_{\text{amide}}^-\}$ | 7.2                    | $\{\text{H3 N}_{\text{im}}^-, \text{N}_{\text{amide}}^-, \text{H10 N}_{\text{im}}^-\}$                                |
|                               |                |           |            |                | 490       | -0.39            |                |                 |                 |                           |                                                                                    | 8                      | $\{\text{D1 N}_{\text{term}}^-, \text{E2 N}_{\text{amide}}^-, \text{H3 N}_{\text{im}}^-, \text{N}_{\text{amide}}^-\}$ |
|                               |                |           |            |                | 310       | -1.05            |                |                 |                 |                           |                                                                                    | 8.9                    | $\{\text{D1 N}_{\text{term}}^-, \text{E2 N}_{\text{amide}}^-, \text{H3 N}_{\text{im}}^-, \text{N}_{\text{amide}}^-\}$ |
|                               |                |           |            |                | 270       | 2.34             |                |                 |                 |                           |                                                                                    |                        |                                                                                                                       |
| $[\text{CuLH}_2]^{2-}$        | 10.3-11.0      | 521       | 172        | 10.3-11.0      | 560       | 0.66             | 11.30          | 207             | 2.170           | 4N                        | $\{\text{N}_{\text{term}}^-, \text{N}_{\text{im}}^-, 2\text{N}_{\text{amide}}^-\}$ | 10.5                   | $\{\text{D1 N}_{\text{term}}^-, \text{E2 N}_{\text{amide}}^-, \text{H3 N}_{\text{im}}^-, \text{N}_{\text{amide}}^-\}$ |
|                               |                |           |            |                | 490       | -0.39            |                |                 |                 |                           |                                                                                    |                        |                                                                                                                       |
|                               |                |           |            |                | 310       | -1.05            |                |                 |                 |                           |                                                                                    |                        |                                                                                                                       |
|                               |                |           |            |                | 270       | 2.34             |                |                 |                 |                           |                                                                                    |                        |                                                                                                                       |

| Bis-DEH 2:1<br>DEHGGGGDEH                        | UV-Vis |                |            | CD    |                |                  | EPR  |                 |                 | Complex | Donors                                                       | NMR |                |
|--------------------------------------------------|--------|----------------|------------|-------|----------------|------------------|------|-----------------|-----------------|---------|--------------------------------------------------------------|-----|----------------|
|                                                  | pH     | $\lambda$      | $\epsilon$ | pH    | $\lambda$      | $\Delta\epsilon$ | pH   | $A_{\parallel}$ | $g_{\parallel}$ |         |                                                              | pH  | Residue donors |
| Bis-DEH species                                  |        |                |            |       |                |                  |      |                 |                 |         |                                                              |     |                |
| [CuH <sub>2</sub> L] <sup>2+</sup>               |        | Not determined |            |       | Not determined |                  |      | Not determined  |                 |         | Not determined                                               |     | Not determined |
| [CuL]                                            |        | Not determined |            |       | Not determined |                  |      | Not determined  |                 |         | Not determined                                               |     | Not determined |
| [CuLH <sub>1</sub> ] <sup>-</sup>                |        | Not determined |            |       | Not determined |                  |      | Not determined  |                 |         | Not determined                                               |     | Not determined |
| [CuL <sub>2</sub> H <sub>2</sub> ] <sup>2-</sup> | 7.06   | 690            | 64         | 7.06  | 575            | -0.29            | 7.06 | 207             | 2.170           | 4N      | {N <sub>term</sub> , N <sub>im</sub> , 2N <sub>amide</sub> } |     | Not determined |
|                                                  |        | 525            | 140        |       | 494            | 0.26             |      |                 |                 |         |                                                              |     |                |
|                                                  |        |                |            |       | 310            | 0.39             |      |                 |                 |         |                                                              |     |                |
|                                                  |        |                |            |       | 273            | -0.97            |      |                 |                 |         |                                                              |     |                |
| [CuL <sub>2</sub> H <sub>3</sub> ] <sup>3-</sup> | 8.00   | 540            | 180        | 8.00  | 592            | -0.44            | 7.06 | 207             | 2.170           | 4N      | {N <sub>term</sub> , N <sub>im</sub> , 2N <sub>amide</sub> } |     | Not determined |
|                                                  |        |                |            |       | 502            | 0.41             |      |                 |                 |         |                                                              |     |                |
|                                                  |        |                |            |       | 308            | 0.37             |      |                 |                 |         |                                                              |     |                |
|                                                  |        |                |            |       | 271            | -0.19            |      |                 |                 |         |                                                              |     |                |
|                                                  |        |                |            |       | 247            | 0.76             |      |                 |                 |         |                                                              |     |                |
| [CuL <sub>2</sub> H <sub>4</sub> ] <sup>4-</sup> | 10.21  | 553            | 230        | 10.21 | 608            | -0.62            |      | Not determined  |                 |         | Not determined                                               |     | Not determined |
|                                                  |        |                |            |       | 509            | 0.65             |      |                 |                 |         |                                                              |     |                |
|                                                  |        |                |            |       | 308            | 0.42             |      |                 |                 |         |                                                              |     |                |
|                                                  |        |                |            |       | 268            | 1.20             |      |                 |                 |         |                                                              |     |                |
| [CuL <sub>2</sub> H <sub>5</sub> ] <sup>5-</sup> |        | Not determined |            |       | Not determined |                  |      | Not determined  |                 |         | Not determined                                               |     | Not determined |

**Table S3.** Coordination mode for the Mn(II):peptide species.

| Peptide                              | Species                       | Residue donor                                                                                                              |
|--------------------------------------|-------------------------------|----------------------------------------------------------------------------------------------------------------------------|
| <b>DP1</b><br><b>DEHGTAVMLK</b>      | $[\text{MnH}_3\text{L}]^{3+}$ | {D1 O <sup>-</sup> carb, E2 O <sup>-</sup> carb, K10 O <sup>-</sup> term-carb}                                             |
|                                      | $[\text{MnH}_2\text{L}]^{2+}$ | {D1 O <sup>-</sup> carb, E2 O <sup>-</sup> carb, H3 N <sub>im</sub> }                                                      |
|                                      | $[\text{MnHL}]^+$             | {D1 N <sub>term</sub> , D1 O <sup>-</sup> carb, E2 O <sup>-</sup> carb, H3 N <sub>im</sub> }                               |
|                                      | $[\text{MnL}]$                | {D1 N <sub>term</sub> , D1 O <sup>-</sup> carb, E2 O <sup>-</sup> carb, H3 N <sub>im</sub> }                               |
| <b>DP2</b><br><b>THMVLAKGED</b>      | $[\text{MnH}_3\text{L}]^{3+}$ | {E9 O <sup>-</sup> carb, D10 O <sup>-</sup> carb O <sup>-</sup> term-carb}                                                 |
|                                      | $[\text{MnH}_2\text{L}]^{2+}$ | {H2 N <sub>im</sub> , E9 O <sup>-</sup> carb, D10 O <sup>-</sup> carb}                                                     |
|                                      | $[\text{MnHL}]^+$             | {T1 N <sub>term</sub> , H2 N <sub>im</sub> , E9 O <sup>-</sup> carb, D10 O <sup>-</sup> carb O <sup>-</sup> term-carb }    |
|                                      | $[\text{MnL}]$                | {T1 N <sub>term</sub> , H2 N <sub>im</sub> , E9 O <sup>-</sup> carb, D10 O <sup>-</sup> carb O <sup>-</sup> term-carb }    |
| <b>Term-DEH</b><br><b>GTAVMLKDEH</b> | $[\text{MnH}_3\text{L}]^{3+}$ | {D8 O <sup>-</sup> carb, E9 O <sup>-</sup> carb, H10 O <sup>-</sup> term-carb}                                             |
|                                      | $[\text{MnH}_2\text{L}]^{2+}$ | {D8 O <sup>-</sup> carb, E9 O <sup>-</sup> carb, H10 N <sub>im</sub> O <sup>-</sup> term-carb}                             |
|                                      | $[\text{MnHL}]^+$             | {G1 N <sub>term</sub> , D8 O <sup>-</sup> carb, E9 O <sup>-</sup> carb, H10 N <sub>im</sub> O <sup>-</sup> term-carb}      |
| <b>Mid-DEH</b><br><b>TMVLDEHAKG</b>  | $[\text{MnH}_3\text{L}]^{3+}$ | {D5 O <sup>-</sup> carb, E6 O <sup>-</sup> carb, H7 N <sub>im</sub> , G10 O <sup>-</sup> term-carb}                        |
|                                      | $[\text{MnH}_2\text{L}]^{2+}$ | {D5 O <sup>-</sup> carb, E6 O <sup>-</sup> carb, H7 N <sub>im</sub> , G10 O <sup>-</sup> term-carb}                        |
|                                      | $[\text{MnHL}]^+$             | {T1 N <sub>term</sub> , D5 O <sup>-</sup> carb, E6 O <sup>-</sup> carb, H7 N <sub>im</sub> , G10 O <sup>-</sup> term-carb} |
|                                      | $[\text{MnL}]$                | {T1 N <sub>term</sub> , D5 O <sup>-</sup> carb, E6 O <sup>-</sup> carb, H7 N <sub>im</sub> , G10 O <sup>-</sup> term-carb} |
| <b>Bis-DEH</b><br><b>DEHGGGDEH</b>   | $[\text{MnH}_3\text{L}]^+$    | {D8 O <sup>-</sup> carb, E9 O <sup>-</sup> carb, H10 O <sup>-</sup> term-carb}                                             |
|                                      | $[\text{MnH}_2\text{L}]$      | {D8 O <sup>-</sup> carb, E9 O <sup>-</sup> carb, H10 N <sub>im</sub> O <sup>-</sup> term-carb}                             |
|                                      | $[\text{MnHL}]^-$             | {D1/8 O <sup>-</sup> carb, E2/9 O <sup>-</sup> carb, H3/10 N <sub>im</sub> }                                               |
|                                      | $[\text{MnL}]^{2-}$           | {D1 N <sub>term</sub> , D1/8 O <sup>-</sup> carb, E2/9 O <sup>-</sup> carb, H3/10 N <sub>im</sub> }                        |
